33 **One Sentence Summary**

34 Single-cell RNA sequencing reveals novel and highly diverse transcriptomic patterns  
35 characteristic of CD4<sup>+</sup> T cell responses to tumors.

36 **Abstract**

37 Most current tumor immunotherapy strategies leverage cytotoxic CD8<sup>+</sup> T cells. Despite  
38 evidence for clinical potential of CD4<sup>+</sup> tumor-infiltrating lymphocytes (TILs), their functional  
39 diversity has limited our ability to harness their activity. To address this issue, we have used  
40 single-cell mRNA sequencing to analyze the response of CD4<sup>+</sup> T cells specific for a defined  
41 recombinant tumor antigen, both in the tumor microenvironment and draining lymph nodes  
42 (dLN). Designing new computational approaches to characterize subpopulations, we identify TIL  
43 transcriptomic patterns strikingly distinct from those elicited by responses to infection, and  
44 dominated by diversity among T-bet-expressing T helper type 1 (Th1)-like cells. In contrast, the  
45 dLN response includes follicular helper (Tfh)-like cells but lacks Th1 cells. We identify a type I  
46 interferon-driven signature in Th1-like TILs, and show that it is found in human liver cancer and  
47 melanoma, in which it is negatively associated with response to checkpoint therapy. Our study  
48 unveils unsuspected differences between tumor and virus CD4<sup>+</sup> T cell responses, and provides a  
49 proof-of-concept methodology to characterize tumor specific CD4<sup>+</sup> T cell effector programs.  
50 Targeting these programs should help improve immunotherapy strategies.

## 51 **Introduction**

52 Immune responses have the potential to restrain cancer development, and most  
53 immunotherapy strategies aim to reinvigorate T cell function to unleash effective anti-tumor  
54 immune responses (1-5). Cytotoxic CD8<sup>+</sup> T lymphocytes are being exploited in clinical settings  
55 due to their ability to recognize tumor neo-antigens and kill cancer cells (3, 6). However,  
56 effective anti-tumor immunity relies on a complex interplay between diverse lymphocyte subsets  
57 that remain poorly characterized. CD4<sup>+</sup> T helper cells, which are essential for effective immune  
58 responses and control the balance between inflammation and immunosuppression (4, 7-9), have  
59 recently emerged as potential therapeutic targets (4-6, 10-14). CD4<sup>+</sup> helper cells contribute to the  
60 priming of CD8<sup>+</sup> T cells and to B cell functions in lymphoid organs (4, 15, 16). CD4<sup>+</sup> T helper  
61 type-1 (Th1) cells secrete the cytokine IFN- $\gamma$  and affect tumor growth by targeting the tumor  
62 microenvironment (TME), antigen presentation through MHC class I and II, and other immune  
63 cells (17-22). Conversely, Th2 cells can promote tumor progression and regulatory T cells (Treg)  
64 mediate immune tolerance, suppressing the function of other immune cells and thus preventing  
65 ongoing anti-tumor immunity (23-25).

66 Despite the anti-tumor potential of CD4<sup>+</sup> T cells, disentangling their functional diversity  
67 has been the limiting factor for pre-clinical and clinical progress. While several studies have  
68 assessed the transcriptome of Treg cells or their tumor reactivity (25, 26-31), the functional  
69 diversity of conventional (non-Treg) tumor-infiltrating lymphocytes (TILs) has remained poorly  
70 understood. Population studies have limited power at identifying new, and especially rare  
71 functional cell states. Conventional single-cell approaches (e.g. flow or mass cytometry)  
72 overcome this obstacle but are necessarily restricted to hypothesis-based targets because of the  
73 number of parameters they can analyze. Furthermore, most previous studies, whether of human  
74 or in experimental tumors, did not distinguish tumor antigen-specific from bystander CD4<sup>+</sup> T

75 cells, even though bystanders may form the vast majority of conventional (non-Treg) T cells in  
76 the TME (28, 30-35), in particular in draining lymphoid organs, where immune responses are  
77 typically initiated.

78 To address these challenges, we applied the resolution of single-cell RNA-sequencing  
79 (scRNAseq) to a tractable experimental system assessing tumor-specific responses both in the  
80 tumor and in lymphoid organs, and we designed new computational analyses to identify  
81 transcriptomic similarities. Our analyses dissect the complexity of the CD4<sup>+</sup> T cell response to  
82 tumor antigens and identify broad transcriptomic divergences between anti-tumor and anti-viral  
83 responses. Emphasizing the power of this approach, new transcriptomic patterns identified in the  
84 present study are also found in CD4<sup>+</sup> T cells infiltrating human tumors and correlate with  
85 response to checkpoint therapy in human melanoma.

## 86 **Results and Discussion**

### 87 *Tracking tumor-specific CD4<sup>+</sup> T cells*

88 We set up a tractable experimental system to study tumor antigen-specific CD4<sup>+</sup> T cells.  
89 We retrovirally expressed the lymphocytic choriomeningitis virus (LCMV) glycoprotein (GP) in  
90 colon adenocarcinoma MC38 cells, using a vector expressing mouse Thy1.1 as a reporter  
91 (**Figure S1A**). Subcutaneous injection of the resulting MC38-GP cells produced tumors allowing  
92 analysis of immune responses by day 15 after injection. We tracked GP-specific CD4<sup>+</sup> T cells  
93 through their binding of tetramerized I-A<sup>b</sup> MHC-II molecules associated with the GP-derived  
94 GP66 peptide (36). Such CD4<sup>+</sup> cells were found in the tumor and draining lymph node (dLN) of  
95 MC38-GP tumor bearing mice, but neither in non-draining LN (nLN) from MC38-GP mice, nor  
96 in mice carrying control MC38 tumors (**Figure S1B**).

97 To study the CD4<sup>+</sup> T cell response to tumor antigens, we aimed to produce genome-wide  
98 single cell mRNA expression profiles (scRNAseq) in CD4<sup>+</sup> TILs and CD4<sup>+</sup> dLN cells. We sorted  
99 GP66-specific T cells from dLNs, as these were the only dLN CD4<sup>+</sup> T cells for which tumor  
100 specificity could be ascertained. Among TILs, we noted that ~87% of GP66-specific CD4<sup>+</sup> T  
101 cells expressed Programmed Cell Death 1 (PD-1, encoded by *Pdcd1*, **Figure S1C**), a marker of  
102 persistent antigenic stimulation (37). Thus, to obtain a broad representation of antigen-specific  
103 TILs, not limited to GP-specific cells, we used PD-1 expression as a surrogate for tumor antigen  
104 specificity and purified tumor CD4<sup>+</sup> CD44<sup>hi</sup> PD-1<sup>+</sup> T cells (PD-1<sup>hi</sup> TIL) for scRNAseq. We  
105 verified critical conclusions of the scRNAseq analyses by flow cytometry, comparing GP66-  
106 specific and PD-1<sup>hi</sup> TILs.

### 107 *Tumor-responsive CD4<sup>+</sup> T cells are highly diverse*

108 We captured GP66-specific dLN and PD-1<sup>hi</sup> TIL (dLN and TILs hereafter, respectively)  
109 CD4<sup>+</sup> cells using the 10x Chromium scRNAseq technology (38); additionally, we captured

110 GP66-specific spleen CD4<sup>+</sup> T cells from LCMV (Armstrong strain)-infected mice (36) as a  
111 technical and biological reference (**Figure S1D**, called ‘LCMV cells’ here). We excluded cells of  
112 low sequencing quality (low number of detected genes), potential doublets, and B cell  
113 contaminants, leaving 566 dLN, 730 TIL, and 2163 LCMV CD4<sup>+</sup> T cells for further analyses  
114 (**Table S1**).

115 We defined groups of cells sharing similar transcriptomic profiles using Phenograph  
116 clustering (39). Consistent with previous studies (40), LCMV cells segregated into follicular  
117 helper (Tfh, providing help to B cells) and type-1 helper (Th1, secreting the cytokine IFN- $\gamma$ ) T  
118 cells, among other subsets (**Figure S2A**). Tfh cells expressed *Tcf7* (encoding the transcription  
119 factor Tcf1), *Cxcr5*, and *Bcl6*, whereas Th1 cells expressed *Tbx21* (encoding the transcription  
120 factor T-bet), *Ifng* (IFN- $\gamma$ ), and *Cxcr6*. Low resolution clustering identified 5 groups of TILs and  
121 dLN cells (**Figure S2B**). Groups I and II had features of Th1 cells, although group II differed by  
122 higher expression of the chemokine receptor *Cxcr3* and lower expression of *Ifng*. Group III  
123 expressed genes typical of Treg cells, including *Foxp3* and *Il2ra*, encoding CD25 (IL-2R $\alpha$ ).  
124 Groups IV and V expressed Tfh cell genes, including *Bcl6* and *Cxcr5*, and group IV *Ccr7*, which  
125 preferentially marks memory cell precursors at the early phase of the immune response (40, 41).

126 To further dissect these populations, we developed a user-independent, data-driven  
127 approach to increase clustering resolution while controlling for false discovery. Applying such  
128 high-resolution clustering separately to TILs and dLN cells, we identified 15 clusters (TIL  
129 clusters t1-t7 and dLN clusters n1-n8), refining the original five main groups (**Figure 1A**).  
130 Revealing unexpected diversity among Th1-like TILs, group I and II resolved into 5  
131 subpopulations, including a distinct cluster (t5) expressing higher levels of *Il7r* (encoding IL-  
132 7R $\alpha$ ) and lower levels of *Tbx21* and *Ifng*. Only cluster group III (Tregs) included both TIL and  
133 dLN cells, which expressed variable levels of *Tbx21*. Groups IV and V, the bulk of dLN cells,

134 resolved into 5 and 2 clusters, respectively. Consistent with flow cytometric analysis, dLN cells  
135 neither expressed high levels of T-bet, the product of *Tbx21*, nor exhibited Th1 attributes; in  
136 contrast, most TILs expressed T-bet, even if at various levels (**Figure 1A and S2C, D**).

137 To support these observations, we analyzed pooled TILs and dLN cells by t-Distributed  
138 Stochastic Neighbor Embedding (t-SNE), a dimensionality reduction approach that positions  
139 cells on a two-dimensional grid based on transcriptomic similarity (42). Although performed on  
140 the pooled populations, t-SNE recapitulated the minimal overlap between TIL and dLN  
141 transcriptomic patterns (**Figure 1B, left**), irrespective of parameter selection (**Figure S2E**) and  
142 even after controlling for potential confounders (**Figure S2F and Supplementary Note and**  
143 **Figure**). Remarkably, cluster groups I-V almost completely segregated from each other when  
144 projected on the t-SNE plot (**Figure 1B, right**). Overlay of gene expression confirmed co-  
145 localization of cells expressing cluster-characteristic genes (**Figure 1C**).

146 To verify the robustness of these observations, we analyzed a biological replicate  
147 consisting of 1123 TILs and 675 dLN GP66-specific cells captured from a separate set of tumors  
148 (**Figure S2G and Table S1**). Because batch-specific effects can confound co-clustering from  
149 distinct experiments, we separately clustered cells from each replicate. To compare these  
150 clusters, we evaluated the correlation between cluster-specific fold-change (FC) vectors, defined  
151 internally to each replicate, that recorded expression of each gene in a cluster relative to all other  
152 clusters in that replicate. We found significant inter-replicate matches for most clusters (**Figure**  
153 **1D**), supporting the reproducibility of the underlying transcriptomic patterns. Thus, scRNAseq  
154 analysis of tumor-specific CD4<sup>+</sup> T cells identifies an unsuspected diversity of transcriptomic  
155 programs in the TME and dLN.

156 *Correlation analyses mitigate tissue-context-specific factors*

157 Comparison of TILs, dLN, and LCMV cells showed little overlap, including between  
158 TILs and dLN cells (**Figure S2H, left**). Thus, we considered that the impact of tissue of origin  
159 could be the primary driver of clustering and mask commonalities in effector programs. Indeed,  
160 most TIL subpopulations had attributes of tissue residency, including low *Slpr1* and *Klf2*  
161 expression, and high expression of *Cd69*, contrasting with LCMV and most tumor dLN clusters  
162 (**Figure 1E**) (43). Only group III Tregs, and separately cells undergoing cell cycle, clustered  
163 together regardless of origin (**Figure S2H, right**). This prompted us to search for potential  
164 underlying similarities among these disparate transcriptomic patterns. We found that data  
165 integration approaches designed to uncover similarities across experimental conditions could not  
166 overcome the separation resulting from biological context (**Figure S3A**), and could miss  
167 functionally relevant differences (e.g. between  $\text{Foxp3}^+$  and  $\text{Foxp3}^-$  TILs, **Figure S3B**) (44).  
168 Thus, we considered the correlation analysis used above for cluster matching. This analysis  
169 distributed the 40 reproducible clusters (out of a total of 47 from all experiments) into 6 ‘meta-  
170 clusters’ (with manual curation attaching meta-cluster 1<sup>b</sup> to 1<sup>a</sup>), of which four (meta-clusters 1,  
171 3, 5 and 6) comprised cells of more than one tissue context (**Figure 2A and Table S2**). Thus, the  
172 correlation analysis establishes relatedness among transcriptomic patterns identified by  
173 conventional clustering.

#### 174 *Characterizing transcriptomic similarities*

175 We further characterized the meta-clusters by identifying their defining overexpressed  
176 genes. In addition to *Foxp3* and *Il2ra*, genes driving meta-cluster 3 (Treg, group III) included  
177 *Ikzf2*, *Tnfrsf4*, encoding Ox40, and *Icos*, which we verified by flow cytometry (**Figures 1E, 2B**  
178 **left, and 2D**). In contrast, *Gzmb* (encoding the cytotoxic molecule Granzyme B) and *Lag3* were  
179 overexpressed in TIL Tregs relative to dLN Tregs (and to other TIL subsets) (**Figure 2B right,**



180 C, E). Thus, the similarity analysis both confirmed the shared Treg circuitry across TILs and  
181 dLN and identified TIL-specific *Gzmb* cytotoxic gene expression in TIL Tregs.

182 Contrasting with Treg clusters, the correlation analysis failed to detect similarities between  
183 the three groups of T-bet-expressing cells. These cells, which showed heterogeneous *Tbx21*  
184 levels, were distributed into meta-clusters 2 (TILs group II, t3-4), 4 (LCMV cells) and 6 (TILs  
185 group I, t1-2) (**Figure 2A**). The two TIL meta-clusters showed multiple differences from  
186 LCMV-responsive Th1 cells, including higher expression of *Il12rb*, *Il7r* and *Il10ra*, and distinct  
187 patterns of transcription factor, chemokine and chemokine receptor expression. Relative to the  
188 other T-bet-expressing cells, TILs group II (t3-4) differed by high expression of multiple type I  
189 IFN-induced genes, including transcription factors *Irf7* and *Irf9* (**Figure 2F top, 2G, S3C**). Co-  
190 expression of these genes with T-bet was unexpected, as T-bet normally represses genes induced  
191 by type I IFN (68). We designated group II t3-4 as interferon stimulated clusters (Isc). Group I  
192 t1-2 TIL clusters (Th1 hereafter) specifically expressed *Lag3* and Killer Cell Lectin (Klr) genes  
193 (**Figure 2F bottom, 2G, S3C**), characteristic of terminally differentiated effector cells (45).  
194 Flow cytometry verified that Th1 TILs did not express the Natural Killer (NK) T cell-specific  
195 transcription factor PLZF, indicating they were not NK T cells (**Figure S3D**). Compared to Isc,  
196 Th1 clusters had higher expression of *Bhlhe40*, a transcription factor controlling inflammatory  
197 Th1 fate determination (46, 47). A recent study of human colon cancer identified a CD4<sup>+</sup> TIL  
198 Th1 subset with elevated *Bhlhe40* expression (31). This subset is clonally expanded and enriched  
199 in tumors with micro-satellite instability, suggesting specificity for tumor antigens. The mouse  
200 Th1 TILs identified in our study had higher expression of 40 genes from the human colon TIL  
201 Th1 signature, including *Bhlhe40* and *Lag3* (**Table S3**), with a significant (p=0.001) skewing  
202 towards this signature detected by GSEA (48). However, mouse Th1 TILs lacked expression of

203 other components of the human signature, including *Gzmb* and *Irf7*, suggesting that the impact of  
204 *Bhlhe40* expression on TIL transcriptomes is in part context-specific.

205 Meta-cluster 6 unexpectedly associated Th1 TILs and a dLN *Ccr7*<sup>+</sup> cluster (Group IV  
206 cluster n5) (**Figure 2A**), suggesting a potential link between TILs and dLN. The association was  
207 driven by transcriptional regulators *Bhlhe40* and *Id2*, and TNF superfamily members *Tnfsf8*  
208 (encoding CD30L) and *Tnfsf11* (RANKL) (**Figures 3A and 1E**). The potential connection  
209 between *Ccr7*<sup>+</sup> dLN cells and Th1 TILs was specific to *Ccr7*<sup>+</sup> cluster n5, which segregated from  
210 n6 and other dLN subsets (Tfh and Treg) based on higher expression of *Ifng* (but not *Tbx21*) and  
211 *Cd200* (**Figure 3B**). Flow cytometry identified a corresponding CD200<sup>hi</sup> subset among Cxcr5<sup>lo</sup>  
212 *Ccr7*<sup>+</sup> but not Cxcr5<sup>+</sup> *Ccr7*<sup>-</sup> (Tfh) GP66-specific cells (**Figure 3C, S3E and S3F**). dLN *Ccr7*<sup>+</sup>  
213 clusters t5-6 shared features with central memory precursor CD4<sup>+</sup> T cells (Tcmp) identified in  
214 LCMV infection (40) (**Table S3 and Figure 1E**). This includes expression of *Tcf7*, a  
215 transcription factor important to prevent T cell terminal differentiation and for CD8<sup>+</sup> T cells  
216 responsiveness to PD-1 blockade (49-56). However, the correspondence between MC38-GP dLN  
217 *Ccr7*<sup>+</sup> clusters and the LCMV Temp signature was only partial (**Table S3**).

218 Meta-cluster 1 comprised LCMV Tfh clusters and dLN group V Tfh clusters (**Figure 2A**).  
219 We verified that the abundance of dLN Tfh cells was similar in mice carrying MC38-GP and  
220 MC38 tumors (**Figure S3G**), indicating that this response is not a consequence of GP expression.  
221 Flow cytometric analysis confirmed key Tfh attributes in dLN and LCMV cells (**Figure 3D**),  
222 although dLN Tfh cells differed from LCMV-responsive Tfh cells by lower expression of *Icos*  
223 and the upregulation of the transcription factor *Maf* (**Figure 3E, 1E and S3H**). Unexpectedly,  
224 meta-cluster 1 associated the dLN and LCMV Tfh clusters with TIL group II cluster t5,  
225 characterized by *Il7r* expression (**Figures 2A and 1A**), based in part on intermediate expression  
226 of *Tcf7* (1.6 fold relative to other TIL subpopulations) (**Figure 3F and 1E**). Flow cytometric

227 analysis confirmed the abundance of GP66-specific IL-7R<sup>+</sup> TILs (**Figure 3G**). In addition, the  
228 *Tcf7<sup>int</sup>* t5 cluster showed expression of the transcription factor *Klf2* and its downstream target  
229 Sphingosine-1-phosphate receptor 1 (*Slpr1*). This indicated retention of a cell trafficking  
230 transcriptional program (57) (**Figure 3F and 1E**) and contrasted with the interferon-driven Isc  
231 TILs. Thus, we designated cluster t5 of group II TILs as putative non-resident cells (nRes  
232 hereafter).

233 To further delineate the relationships between cell clusters, we used Reversed Graph  
234 Embedding (58), which has been used to estimate progression through transcriptomic states. This  
235 placed the dLN Tfh and TIL Th1 and Isc at the end of an inferred path (**Figure 3H**), nRes TILs  
236 in the middle of the continuum and *Ccr7<sup>+</sup>* dLN cells between Tfh and nRes. These analyses,  
237 combined with the similarities described by meta-clustering, support the notion that the tumor-  
238 responsive CD4<sup>+</sup> T cell response may be characterized as a transcriptomic continuum; they  
239 confirm the transcriptomic distance between Th1 and Isc TILs, even though both subsets express  
240 T-bet, the Th1-defining factor.

#### 241 *TILs subpopulation-specific dysfunction gene programs*

242 We reasoned that expression of a dysfunction-exhaustion program (59, 60) may account  
243 for the limited relatedness between LCMV and TIL Th1 cells, as TILs expressed multiple  
244 exhaustion marks (**Figure 4A**), and were sorted for PD-1 expression for scRNAseq. To assess  
245 the impact of exhaustion on TIL subpopulation, we defined TIL Th1, Isc, nRes and Treg gene  
246 signatures as the genes preferentially expressed in each subpopulation relative to all other TILs  
247 (**Table S4**). We found a significant overlap between multiple viral-response exhaustion gene  
248 signatures (MSigDB) (61) and the Th1 and Treg signatures (**Table S5**). Separate analysis of a  
249 previously reported gene signature characterizing CD4<sup>+</sup> T cell dysfunction during chronic

250 infection (62) indicated a significant overlap with the Isc signature, but not with Th1 and Treg  
251 signatures (**Figure S4A, Table S6**).

252 The latter result suggested heterogeneous expression of exhaustion genes among TIL  
253 subsets. We tested this possibility using a broader set of exhaustion genes shared across cancer  
254 and chronic infection (63). 55 genes from this set were also part of TIL Th1, Isc, or Treg  
255 signatures. However, their overlap was heterogeneous, identifying dysfunction programs specific  
256 of TIL subpopulations (**Figure 4B, Table S6**). Of note, we did not detect overlap between any  
257 dysfunction-exhaustion signature and nRes TILs (**Figure 4B, Table S6**). This is in line with  
258 these cells' residual expression of *Tcf7*, which in CD8<sup>+</sup> T cells marks cells with conserved  
259 responsiveness (52-54, 64).

260 *The Isc IFN signature correlates with poor clinical prognosis in human tumors*

261 Last, we examined if MC38-GP TIL transcriptomic patterns were observed in human  
262 tumors. We analyzed published CD4<sup>+</sup> Human liver cancer TILs (TIL<sub>HLC</sub>) scRNAseq data pooled  
263 across six treatment-naive patients (28). High resolution clustering separated the TIL<sub>HLC</sub> cells  
264 into 11 clusters, which could be combined into groups displaying features of Th1, Isc, Treg TILs  
265 and cells undergoing cell cycle (**Figure 4C**). While pooled analysis of CD4<sup>+</sup> PD-1<sup>+</sup> TILs from  
266 MC38-GP tumors (TIL) with TIL<sub>HLC</sub> only identified similarities between cells undergoing cell  
267 cycle (**Figure S4B and S4C**), cluster correlation analysis indicated significant similarities  
268 between Tregs, cell cycle, and Isc clusters from TIL vs. TIL<sub>HLC</sub> (**Figure 4D, top**). We focused on  
269 the Isc pattern, which differed the most from previously reported Th1 and Treg transcriptomic  
270 profiles. We found a significant overlap of overexpression patterns between TIL Isc and their  
271 human counterpart, including type I IFN-induced genes and *Irf7* (65) (**Figure 4D, bottom and**  
272 **Table S7**). Thus, the Isc signature newly identified among mouse CD4<sup>+</sup> TILs is found in human  
273 tumors.

274 These findings were not unique to liver tumors, as analysis of CD4<sup>+</sup>CD3<sup>+</sup> human melanoma  
275 TILs across 48 lesions (TIL<sub>Mel</sub>) (33) identified a cluster enriched in Isc characteristic genes,  
276 among other populations (**Figure S4D**). To investigate the relationships between Isc  
277 transcriptomic program and clinical prognosis, we evaluated the association between the  
278 expression in TIL<sub>Mel</sub> of Isc signature genes (defined in MC38-GP TILs) and patient response to  
279 checkpoint therapy. Relative to responders, non-responsive tumors had significantly higher  
280 fractions of cells expressing Isc signature genes (49 out of 108 genes, adjusted p-value < 0.05),  
281 including *Stat1*, *Irf7* and *Irf9* (**Figure 4E and Table S8**). This indicated negative association  
282 between the Isc transcriptomic program and patient response to checkpoint therapy. Thus, the  
283 methods used in the present study identify transcriptomic programs shared by multiple tumor  
284 types and of potential prognostic significance.

285 In summary, using scRNAseq and data-driven computational approaches, the present study  
286 identifies an unsuspected diversity among tumor-responding CD4<sup>+</sup> T cells. While recent  
287 scRNAseq studies had shed light on the Treg component of CD4<sup>+</sup> TILs (28, 30-32), our study  
288 assessed the transcriptomic patterns of both regulatory and conventional components, in the  
289 tumor itself and in draining lymphoid organs. We identify new transcriptomic patterns and find a  
290 heterogeneous distribution of exhaustion gene signatures among TILs subtypes, highlighting the  
291 need for extensive analyses of cell-specific effects of treatments targeting exhaustion genes.

292 Even though most conventional (Foxp3<sup>-</sup>) tumor-responsive TILs express T-bet, the Th1-  
293 defining transcriptional regulator, our study identifies novel and diverse transcriptomic patterns  
294 with unexpectedly little similarity to prototypical virus-responsive Th1 cells. Thus, conventional  
295 helper effector definitions, derived from studies of responses to infection, are inaccurate  
296 descriptors of responses to tumors. The newly identified Th1-like transcriptome with marks of  
297 type I IFN stimulation, a driver of inflammation and immunosuppression in cancer (66),

298 highlights this conclusion: it was observed among TILs but not LCMV-responding cells, even  
299 though LCMV drives a strong type I IFN innate immune response (67). Our cluster similarity  
300 analysis projects this interferon-responsive transcriptomic pattern onto human tumors,  
301 overcoming potential sample disparity, and demonstrates its association with response to  
302 checkpoint therapy.

303         Investigating tumor-specific T cell responses in draining lymphoid organs revealed  
304 striking differences with TILs. The absence of Th1 cells from tumor dLN was unexpected and  
305 contrasted with infections, including with LCMV or with *Leishmania major*, a typical Th1-  
306 driving parasite with kinetics of clinical progression similar to that of experimental tumors, and  
307 in which Th1 dLN cells are important contributors to the response (69). In contrast, the tumor  
308 elicited strong, tumor-specific Foxp3-negative Tfh-like responses in dLN. While Tfh  
309 differentiation may divert T cells from more efficient (e.g. IFN $\gamma$ -producing) anti-tumor  
310 differentiation, it provides support for the tantalizing possibility that tumor-elicited B cell  
311 responses could be exploited against cancer (70). It is also possible that this subset includes a  
312 stem cell-like component similar to the Cxcr5<sup>+</sup> CD8<sup>+</sup> dLN T cells that serve as targets for  
313 immunotherapy targeting PD-1 signaling (52), or cells with similar properties in the tumor  
314 micro-environment (54).

315         In conclusion, this study provides a high-resolution characterization of tumor-reactive  
316 CD4<sup>+</sup> T cell responses in lymphoid organs and the tumor microenvironment. We identify  
317 previously unrecognized transcriptomic patterns among tumor-specific T cells and provide an  
318 extensive mapping of the CD4<sup>+</sup> T cell immune response against cancer. We describe new  
319 analytical approaches of broad applicability, including to clinical data, that combine high  
320 resolution dissection of transcriptomic patterns and synthetic data integration to identify  
321 correspondences between apparently unrelated cell differentiation states.

322 **Materials and Methods**

323

324 **Mice.** C57BL/6 mice were purchased from the National Cancer Institute Animal  
325 Production Facility and were housed in specific pathogen-free facilities. Animal procedures were  
326 approved by the NCI Animal Care and Use Committee.

327 **Cell lines and constructs.** MC38 murine colon cancer cell lines (71) were obtained from  
328 Jack Greiner's lab and cultured in DMEM that contained 10% heat-inactivated FCS, 0.1 mM  
329 nonessential amino acids, 1 mM sodium pyruvate, 0.292mg/ml L-glutamine, 100 pg/ml  
330 streptomycin, 100 U/mL penicillin, 10mM Hepes. MC38-GP cells were generated as follows:  
331 LCMV-*gp* gene was amplified from pHCMV-LCMV-Arm53b (addgene#15796) and inserted  
332 into pMRX-IRES-Thy1.1 by BamH1 and Not1. Then pMRX-Thy1.1 contained LCMV-*gp* gene  
333 was transfected into Plat E cell to package retrovirus. MC38 cell line was transduced by above  
334 retrovirus collection and followed by single cell sorting in 96-well plate after 48hs. The  
335 monoclonal cell lines were identified by flow cytometry and western blot.

336 **LCMV infection model and Tumor model.**  $2 \times 10^5$  pfu of LCMV Armstrong (36) were  
337 injected intra-peritoneal in 6-12 weeks old C57BL/6 mice. Mice were analyzed 7 days post  
338 infection. MC38 and MC38-GP tumor cells ( $0.5 \times 10^6$ ) were subcutaneously injected into the  
339 flank of C57BL/6 mice.

340 **Antibodies.** Antibodies for the following specificities were purchased either from  
341 Affymetrix Becton-Dickinson Pharmingen or ThermoFisher Ebiosciences: CD4 (RM4.4 or  
342 GK1.5), CD8 $\beta$  (H35-17.2), CD45.2 (104), CD45 (30-F11), TCR $\beta$  (H57-597), CD5 (53-7.3),  
343 B220 (RA3-6B2), Siglec F (E50-2440), NK1.1 (PK136), CD11b (M1/70), CD11c (N418),  
344 CD44 (356 IM7), IL7R (A7R34), CCR7 (4B12), CXCR5 (SPRCL5), Bcl6 (K112-91), Lag3  
345 (C9B7W), Cxcr6(SA051D1), CD25(PC61.5), CD278(7E,17G9), PD-1 (J43), Foxp3(FJK-16s),

346 Granzyme B(FGB12), Tbet (4B10), CD200(OX-90). Streptavidin, MHC tetramers loaded with  
347 the *Toxoplasma gondii* AS15 (72) and LCMV GP66 peptides (AVEIHRPVPGTAPPS and  
348 DIYKGVYQFKSV, respectively) were obtained from the NIH Tetramer Core Facility.

349 **Cell preparation and flow cytometry.** Lymph node and spleen were prepared and stained  
350 as previously described (73). For TIL preparation, tumors were dissected 14 to 18 days post-  
351 injection, washed in HBSS, cut into small pieces, and subjected to enzymatic digestion with  
352 0.25mg/ml liberase (Roche) and 0.5mg/ml DNAase I (SIGMA) for 30 minutes at 37 degrees.  
353 The resulting material were passed through 70um filters and pelleted by centrifugation at  
354 1500rpm. Cell pellets were resuspended in 44% Percoll (GE Healthcare) on an underlay of 67%  
355 Percoll, and centrifuged for 20min at 1600 rpm without brake. TILs were isolated from the  
356 44%/67% Percoll interface. Following isolation, cells were blocked with anti-FcγRIII/FcγRII  
357 (unconjugated, 2.4G2) and subsequently stained for flow cytometry. Staining for AS15:I-A<sup>b</sup>  
358 tetramer, GP66:I-A<sup>b</sup> tetramer and CXCR5 was performed at 37 degrees for 1 hour prior to  
359 staining for other cell surface markers. For intracellular staining, cell surface staining were  
360 preformed first, following fixation using the Foxp3-staining kit (eBioscience). Flow cytometry  
361 data was acquired on LSR Fortessa cytometers (BD Biosciences) and analyzed with FlowJo  
362 (TreeStar) software. Dead cells and doublets were excluded by LiveDead staining (Invitrogen)  
363 and forward scatter height by width gating. Purification of lymphocytes by cell sorting was  
364 performed on a FACS Aria or FACS Fusion (BD Biosciences).

365 **Single cell RNAseq.** 3000-13000 T cells sorted from LCMV infected or tumor-bearing  
366 mice were loaded on the Chromium platform (10X Genomics) and libraries were constructed  
367 with a Single Cell 3' Reagent Kit V2 according to the manufacturer instructions. Libraries were  
368 sequenced on multiple runs of Illumina NextSeq using paired-end 26x98bp or 26x57bp to reach  
369 a sequencing saturation greater than 70% resulting in at least 49000 reads/cell.



370       **scRNA-seq data pre-processing.** De-multiplexing, alignment to the mm10 transcriptome  
371 and unique molecular identifier (UMI) calculation were performed using the 10X Genomics  
372 Cellranger toolkit (v2.0.1, <http://software.10xgenomics.com/single-cell/overview/welcome>). Pre-  
373 processing, dimensionality reduction and clustering analyses procedures were applied to each  
374 dataset (that is, specific tissue origin in each experiment) independently to account for dataset-  
375 specific technical variation such as sequencing depth and biological variation in population  
376 composition, as follows. We filtered out low quality cells with fewer than 500 detected genes  
377 (those with at least one mapped read in the cell). Potential doublets were defined as cells with  
378 number of detected genes or number of UMIs above the 98<sup>th</sup> quantile (top 2% owing to up to 2%  
379 estimated doublets rate in the 10X Chromium system). Potentially senescent cells (more than  
380 10% of the reads in the cell mapped to 13 mitochondrial genes) were also excluded. Library size  
381 ( $LS_j$ , number of UMIs in cell  $j$ ) normalization and natural log transformation were applied to  
382 each cell library, i.e.,  $norm_j^i = \ln\left(\frac{raw_j^i}{LS_j} + 1\right)$ , to quantify the expression of gene  $i$  in cell  $j$ ,  
383 where  $raw_j^i$  is the number of reads for gene  $i$  in cell  $j$ .

384       **Dimensionality reduction.** Highly variable genes were defined as genes with greater than  
385 one standard deviation of the dispersion from the average expression of each gene. However, to  
386 account for heteroscedasticity, variable genes were identified separately in bins defined based on  
387 average expression. PCA analysis was performed on the normalized expression of the set of  
388 dataset-specific highly variable genes. We selected the top PCs based on gene permutation test  
389 (74). ‘Barnes-hut’ approximate version of t-SNE (75) (perplexity set to 30, 10k iterations) was  
390 applied on the top PCs to obtain a 2D projection of the data for visualization.

391       **Gene signature activation quantification.** Gene signature activation was quantified  
392 relative to a technically similar background gene set as described in (76). Briefly, we identify the

393 top 10 most similar (nearest neighbours) genes in terms of average expression and variance, then  
394 define the signature activation as the average expression of the signature genes minus the  
395 average expression of the background genes. GP66 tetramer staining signature definition is  
396 described in **Supplementary Note**. Additionally, we defined lists of ribosomal, mitochondrial,  
397 and cell cycle genes (77) for confounder controls (**Table S10**).

398 **High resolution clustering.** Phenograph clustering (39) using the top PCs (see  
399 dimensionality reduction) was performed independently on each dataset to allow full control of  
400 the clustering resolution based on dataset-specific coverage and heterogeneity features. The  
401 clustering resolution (number of clusters) is controlled by the K nearest neighbour (KNN)  
402 parameter. We designed a simulation analysis to estimate the optimal clustering resolution, i.e.,  
403 at what resolution the clustering is superior in quality to clustering driven by technical biases  
404 inherent to scRNAseq, as follows. Here we define the clustering quality as the clustering  
405 modularity reported by Phenograph, which indicates intra-cluster compactness and inter-cluster  
406 separation. The simulations consist of repeating the clustering analysis on 100 shuffled  
407 expression matrices to estimate the ‘null’ distribution of the clustering quality, where the gene  
408 expression measurements are permuted within each cell to retain the cell-specific coverage  
409 biases. We repeated this process for varying value of the KNN parameter  $k$  to compare the  
410 clustering modularity of the original  $O_k$  to the shuffled  $S_k$  data. The final resolution was defined  
411 as the maximal resolution where  $\frac{O_k}{S_k} \geq 2$ . Pooled clustering analysis (joint rather than separated  
412 by dataset) and visualization was performed using PCA on the aggregate list of highly variable  
413 genes defined on each dataset. Clustering was done with and without controlling for confounding  
414 factors (number of UMIs, number of detected genes and gene signatures activation of ribosomal,  
415 mitochondrial, cell cycle and GP66 staining signature). Clustering analysis of TILs, dLN, and  
416 LCMV cells showed little overlap even after correcting for potential confounders.

417 After obtaining the initial clusters and identifying the overexpressed genes in each cluster,  
418 we apply two filters: (1) we exclude small clusters of B cells (CD79<sup>+</sup> populations) from each  
419 dataset. (2) We identify PCs driven by B cell marker genes and remove the individual cells  
420 whose expression profile has high scores for those PCs (outliers). We then repeat the entire  
421 processing and clustering to prevent detecting highly variable genes and PCs driven by  
422 contaminations, which may in turn reduce the signal of other small populations of interest.

423 **Differential expression analysis and population matching.** Differential expression was  
424 performed using Limma (version 3.32.10). We initially performed differential expression  
425 analysis between each cluster against the pool of all other clusters within a given dataset.  
426 Identified clusters were labelled as a known T cell subtype if the majority of the known subtype-  
427 defining genes were differentially over-expressed in that cluster. We then matched populations  
428 across experiments to assess the reproducibility of the populations and to uncover similarities  
429 across datasets that are masked due to overall tissue-context-specific differences. To reduce the  
430 effects of tissue-context-specific effects on the similarity calculation, we used the fold change  
431 (FC) measure of each gene  $FC_g^c = \frac{\langle foreground_g \rangle}{\langle background_g \rangle}$  (average of gene  $g$  in cluster  $c$  (foreground)  
432 relative to all other clusters (background) of the same dataset). Then we measured the Pearson  
433 correlation between the FC vectors of all pairs of clusters across datasets. We compare this  
434 approach with an alternative approach that uses Euclidean distances between the average  
435 expression vectors, defined as average expression of all genes in a cluster and a recent data  
436 integration approach (44) following tutorial specifications  
437 [[https://satijalab.org/seurat/immune\\_alignment.html](https://satijalab.org/seurat/immune_alignment.html); version 2.0.1].

438 **Robust cluster calling and robust population comparisons.** For each dataset, we defined  
439 ‘robust clusters’ as those that had highly similar match in the biological replicate. High similarity

440 is defined as Pearson correlation coefficient greater than  $\sim 1.28$  standard deviations from the  
441 mean for each dataset, corresponding to nominal p-value of 0.1. Hierarchical clustering was  
442 performed on the identified robust clusters using the inter-cluster similarity matrix, where the  
443 similarity was defined as above using the Pearson correlation between the FC vectors. Using the  
444 vector of average expression vectors did not achieve similar result; specifically, using  
445 hierarchical clustering of the Euclidean distances between the clusters average expression vector  
446 retained the grouping of clusters based on origin tissue (**Figure S3A**). We then analyzed  
447 differential expression patterns for clusters belonging to each meta-cluster, excluding cell cycle  
448 clusters. For a given pair of clusters of interest, A and B in datasets X and Y respectively, we  
449 performed three differential expression analyses: (1) differential expression in A relative to other  
450 clusters in X, (2) differential expression in B relative to other clusters in Y, and (3) differential  
451 expression in A relative to B. In addition to average expression differences, we quantified the  
452 detection rate of gene X as proportion of cells where 1 or more reads was mapped to X and  
453 prioritized differentially expressed genes exhibiting also differential detection across conditions.  
454 This analysis was performed for the two replicates separately and the results interpreted jointly; a  
455 gene was deemed as over-expressed in cluster A in tissue X if it is over-expressed relative to  
456 other clusters in X as well as relative to B, in both replicates.

457 **scRNAseq contour plots.** Normalized scRNAseq expression measurements were  
458 visualized as contours, where zero (0) values were assigned random value drawn from a normal  
459 distribution centered around 0.

460 **Reversed Graph Embedding.** Trajectory analysis of TIL populations (group I and II,  
461 excluding group III Tregs) was performed using Monocle (version 2.9.0, parameters  
462 `max_components = 2, method = DDRTree`).

463 **Gene signature definition.** For each TIL subpopulation (group I Th1, group II Isc, group  
464 II nRes and group III Treg) we selected overexpressed genes exhibiting differential detection (as  
465 defined above) relative to all other TILs across both experiments (**Table S4**).

466 **Correspondence to human data.** Human liver cancer TIL scRNAseq counts were  
467 downloaded from GEO [GSE98638]. Non-CD4<sup>+</sup> T cells were filtered based on the classification  
468 in the original publication (28). Human gene symbols were translated to Mouse gene symbols  
469 using package biomaRt (version 2.37.8). Pre-processing, clustering and population matching  
470 analysis were applied as described above. Human melanoma TILs data scRNAseq counts were  
471 downloaded from GEO [GSE120575]. We selected CD4<sup>+</sup> T cells as cells with at least one  
472 mapped read to CD4 and [CD3D or CD3E or CD3G], following the authors definition (33). 108  
473 out of 136 Isc signature genes were mapped to human gene symbols. The detection rate of each  
474 Isc signature gene (as defined above) in each lesion were used to assess differential detection  
475 across responders and non-responders. We used two-sided Wilcoxon test to quantify the  
476 significance of differential activation.

477 **Correspondence with external gene signatures.** Gene set enrichment analysis of  
478 immunologic gene signatures was performed using mSigDB (61) [C7: immunologic signatures  
479 database with clusterProfiler package (version 3.4.3). All other gene signatures were downloaded  
480 from the original publication's supplementary materials. Correspondence to Tcmp signature was  
481 performed by differential expression of dLN *Ccr7*<sup>+</sup> clusters n5-6 relative to other dLN and TIL  
482 (n1, n7-8, t1-7) rather than dLN subpopulations alone to satisfy the background conditions used  
483 in the original publication. The heterogeneity of the IL-27 co-inhibitory gene signature (63) was  
484 evaluated by analyzing differential gene expression across Th1, Isc, and Treg TIL, indicating  
485 which genes are preferentially expressed in one subpopulation versus the others.

## 486 **Acknowledgments**

487 We thank Melanie S. Vacchio for cell sorting; Mariah Balmaceno-Criss and Qi Xiao for  
488 animal genotyping; Jack Greiner for the MC38 cell line; the NIH tetramer facility for reagents;  
489 the CCR Flow Cytometry Core for expert assistance; Yasmine Belkaid and Avinash Bhandoola  
490 for thoughtful discussions; Jonathan Ashwell, John O’Shea, Nicholas Restifo, Eytan Rupp and  
491 Xin Wang for critical reading of the manuscript; and David Goldstein, Mariam Malik and the  
492 NCI Office of Science and Technology Resources for their support. This work used the NIH  
493 High performance computing cluster and was supported by the Intramural Research Program of  
494 the National Cancer Institute, Center for Cancer Research, National Institutes of Health.

## 495 **Author contributions**

496 A.M., J.N., T.C., S.H. and R.B. designed research; A.M. designed and developed  
497 computational (bioinformatic) pipelines; A.M. and J.N. and T.C. performed research and  
498 analyzed data. S.T. guided TIL isolation procedures. D.M. provided advice on LCMV biology  
499 and LCMV viral stocks. M.M., Y. Z., and B.T. contributed to scRNA-seq capture. A.M. and  
500 R.B. wrote the manuscript with contributions from J.N. and S.H. S.H. and R.B. supervised the  
501 research.

## 502 **Competing interests**

503 The authors declare no competing interests.

## 504 **Data and code availability**

505 Data was deposited in [GEO GSE124691]. The computational pipeline is available on  
506 [<https://github.com/asmagen/MagenSingleCell>]. The pipeline requires access to Slurm high-  
507 performance computing core for efficient simulation analyses.

## 508 References

509

- 510 1. A. Ribas, J. D. Wolchok, Cancer immunotherapy using checkpoint blockade. *Science* **359**,  
511 1350-1355 (2018).
- 512 2. T. F. Gajewski, H. Schreiber, Y. X. Fu, Innate and adaptive immune cells in the tumor  
513 microenvironment. *Nat Immunol* **14**, 1014-1022 (2013).
- 514 3. S. A. Rosenberg, N. P. Restifo, Adoptive cell transfer as personalized immunotherapy for  
515 human cancer. *Science* **348**, 62-68 (2015).
- 516 4. J. Borst, T. Ahrends, N. Babala, C. J. M. Melief, W. Kastenmuller, CD4(+) T cell help in  
517 cancer immunology and immunotherapy. *Nat Rev Immunol* **18**, 635-647 (2018).
- 518 5. S. C. Wei *et al.*, Distinct Cellular Mechanisms Underlie Anti-CTLA-4 and Anti-PD-1  
519 Checkpoint Blockade. *Cell* **170**, 1120-1133 (2017).
- 520 6. P. A. Ott *et al.*, An immunogenic personal neoantigen vaccine for patients with melanoma.  
521 *Nature* **547**, 217-221 (2017).
- 522 7. J. A. Bluestone, C. R. Mackay, J. J. O'Shea, B. Stockinger, The functional plasticity of T  
523 cell subsets. *Nat Rev Immunol* **9**, 811-816 (2009).
- 524 8. J. Zhu, H. Yamane, W. E. Paul, Differentiation of effector CD4 T cell populations (\*).  
525 *Annu Rev Immunol* **28**, 445-489 (2010).
- 526 9. S. Sakaguchi, T. Yamaguchi, T. Nomura, M. Ono, Regulatory T cells and immune  
527 tolerance. *Cell* **133**, 775-787 (2008).
- 528 10. E. Tran *et al.*, Cancer immunotherapy based on mutation-specific CD4+ T cells in a patient  
529 with epithelial cancer. *Science* **344**, 641-645 (2014).
- 530 11. N. N. Hunder *et al.*, Treatment of metastatic melanoma with autologous CD4+ T cells  
531 against NY-ESO-1. *N Engl J Med* **358**, 2698-2703 (2008).
- 532 12. E. H. Aarntzen *et al.*, Targeting CD4(+) T-helper cells improves the induction of antitumor  
533 responses in dendritic cell-based vaccination. *Cancer Res* **73**, 19-29 (2013).
- 534 13. N. Malandro *et al.*, Clonal Abundance of Tumor-Specific CD4(+) T Cells Potentiates  
535 Efficacy and Alters Susceptibility to Exhaustion. *Immunity* **44**, 179-193 (2016).
- 536 14. D. Mumberg *et al.*, CD4(+) T cells eliminate MHC class II-negative cancer cells in vivo  
537 by indirect effects of IFN-gamma. *Proc Natl Acad Sci U S A* **96**, 8633-8638 (1999).
- 538 15. T. Ahrends *et al.*, CD4(+) T Cell Help Confers a Cytotoxic T Cell Effector Program  
539 Including Coinhibitory Receptor Downregulation and Increased Tissue Invasiveness.  
540 *Immunity* **47**, 848-861 e845 (2017).
- 541 16. S. Crotty, A brief history of T cell help to B cells. *Nat Rev Immunol* **15**, 185-189 (2015).
- 542 17. Z. Qin, T. Blankenstein, CD4+ T cell--mediated tumor rejection involves inhibition of  
543 angiogenesis that is dependent on IFN gamma receptor expression by nonhematopoietic  
544 cells. *Immunity* **12**, 677-686 (2000).
- 545 18. G. Beatty, Y. Paterson, IFN-gamma-dependent inhibition of tumor angiogenesis by tumor-  
546 infiltrating CD4+ T cells requires tumor responsiveness to IFN-gamma. *J Immunol* **166**,  
547 2276-2282 (2001).
- 548 19. L. Tian *et al.*, Mutual regulation of tumour vessel normalization and immunostimulatory  
549 reprogramming. *Nature* **544**, 250-+ (2017).
- 550 20. T. Kammertoens *et al.*, Tumour ischaemia by interferon-gamma resembles physiological  
551 blood vessel regression. *Nature* **545**, 98-+ (2017).
- 552 21. E. Alspach, D. M. Lussier, R. D. Schreiber, Interferon gamma and Its Important Roles in  
553 Promoting and Inhibiting Spontaneous and Therapeutic Cancer Immunity. *Cold Spring*  
554 *Harb Perspect Biol*, (2018).

- 555 22. R. Bos, L. A. Sherman, CD4(+) T-Cell Help in the Tumor Milieu Is Required for  
556 Recruitment and Cytolytic Function of CD8(+) T Lymphocytes. *Cancer Research* **70**,  
557 8368-8377 (2010).
- 558 23. D. G. DeNardo *et al.*, CD4(+) T cells regulate pulmonary metastasis of mammary  
559 carcinomas by enhancing protumor properties of macrophages. *Cancer Cell* **16**, 91-102  
560 (2009).
- 561 24. A. Tanaka, S. Sakaguchi, Regulatory T cells in cancer immunotherapy. *Cell Res* **27**, 109-  
562 118 (2017).
- 563 25. J. L. Chao, P. A. Savage, Unlocking the Complexities of Tumor-Associated Regulatory T  
564 Cells. *J Immunol* **200**, 415-421 (2018).
- 565 26. M. De Simone *et al.*, Transcriptional Landscape of Human Tissue Lymphocytes Unveils  
566 Uniqueness of Tumor-Infiltrating T Regulatory Cells. *Immunity* **45**, 1135-1147 (2016).
- 567 27. G. Plitas *et al.*, Regulatory T Cells Exhibit Distinct Features in Human Breast Cancer.  
568 *Immunity* **45**, 1122-1134 (2016).
- 569 28. C. Zheng *et al.*, Landscape of Infiltrating T Cells in Liver Cancer Revealed by Single-Cell  
570 Sequencing. *Cell* **169**, 1342-1356 e1316 (2017).
- 571 29. S. Malchow *et al.*, Aire-dependent thymic development of tumor-associated regulatory T  
572 cells. *Science* **339**, 1219-1224 (2013).
- 573 30. M. Ahmadzadeh *et al.*, Tumor-infiltrating human CD4(+) regulatory T cells display a  
574 distinct TCR repertoire and exhibit tumor and neoantigen reactivity. *Sci Immunol* **4**,  
575 (2019).
- 576 31. L. Zhang *et al.*, Lineage tracking reveals dynamic relationships of T cells in colorectal  
577 cancer. *Nature* **564**, 268-272 (2018).
- 578 32. E. Azizi *et al.*, Single-Cell Map of Diverse Immune Phenotypes in the Breast Tumor  
579 Microenvironment. *Cell* **174**, 1293-1308 e1236 (2018).
- 580 33. M. Sade-Feldman *et al.*, Defining T Cell States Associated with Response to Checkpoint  
581 Immunotherapy in Melanoma. *Cell* **175**, 998-1013 e1020 (2018).
- 582 34. T. Duhon *et al.*, Co-expression of CD39 and CD103 identifies tumor-reactive CD8 T cells  
583 in human solid tumors. *Nat Commun* **9**, (2018).
- 584 35. Y. Simoni *et al.*, Bystander CD8(+) T cells are abundant and phenotypically distinct in  
585 human tumour infiltrates. *Nature* **557**, 575-+ (2018).
- 586 36. M. Matloubian, R. J. Concepcion, R. Ahmed, Cd4(+) T-Cells Are Required to Sustain  
587 Cd8(+) Cytotoxic T-Cell Responses during Chronic Viral-Infection. *J Virol* **68**, 8056-8063  
588 (1994).
- 589 37. Y. Agata *et al.*, Expression of the PD-1 antigen on the surface of stimulated mouse T and  
590 B lymphocytes. *Int Immunol* **8**, 765-772 (1996).
- 591 38. G. X. Zheng *et al.*, Massively parallel digital transcriptional profiling of single cells. *Nat*  
592 *Commun* **8**, 14049 (2017).
- 593 39. J. H. Levine *et al.*, Data-Driven Phenotypic Dissection of AML Reveals Progenitor-like  
594 Cells that Correlate with Prognosis. *Cell* **162**, 184-197 (2015).
- 595 40. T. Ciucci *et al.*, The Emergence and Functional Fitness of Memory CD4(+) T Cells Require  
596 the Transcription Factor Thpok. *Immunity* **50**, 91-105 e104 (2019).
- 597 41. M. Pepper, M. K. Jenkins, Origins of CD4(+) effector and central memory T cells. *Nat*  
598 *Immunol* **12**, 467-471 (2011).
- 599 42. G. H. Laurens van der Maaten, Visualizing Data using t-SNE. *Journal of Machine*  
600 *Learning Research*, 2579-2605 (2008).
- 601 43. L. K. Mackay, A. Kallies, Transcriptional Regulation of Tissue-Resident Lymphocytes.  
602 *Trends Immunol* **38**, 94-103 (2017).



- 603 44. A. Butler, P. Hoffman, P. Smibert, E. Papalexi, R. Satija, Integrating single-cell  
604 transcriptomic data across different conditions, technologies, and species. *Nat Biotechnol*  
605 **36**, 411-420 (2018).
- 606 45. N. S. Joshi, S. M. Kaech, Effector CD8 T cell development: A balancing act between  
607 memory cell potential and terminal differentiation. *Journal of Immunology* **180**, 1309-1315  
608 (2008).
- 609 46. F. Yu *et al.*, The transcription factor Bhlhe40 is a switch of inflammatory versus  
610 antiinflammatory Th1 cell fate determination. *J Exp Med* **215**, 1813-1821 (2018).
- 611 47. H. Sun, B. F. Lu, R. Q. Li, R. A. Flavell, R. Taneja, Defective T cell activation and  
612 autoimmune disorder in Stra13-deficient mice. *Nature Immunology* **2**, 1040-1047 (2001).
- 613 48. A. Subramanian *et al.*, Gene set enrichment analysis: A knowledge-based approach for  
614 interpreting genome-wide expression profiles. *P Natl Acad Sci USA* **102**, 15545-15550  
615 (2005).
- 616 49. G. Jeannet *et al.*, Essential role of the Wnt pathway effector Tcf-1 for the establishment of  
617 functional CD8 T cell memory. *Proc Natl Acad Sci U S A* **107**, 9777-9782 (2010).
- 618 50. L. Gattinoni *et al.*, Wnt signaling arrests effector T cell differentiation and generates CD8+  
619 memory stem cells. *Nature medicine* **15**, 808-813 (2009).
- 620 51. X. Y. Zhou *et al.*, Differentiation and Persistence of Memory CD8(+) T Cells Depend on  
621 T Cell Factor 1. *Immunity* **33**, 229-240 (2010).
- 622 52. S. J. Im *et al.*, Defining CD8+ T cells that provide the proliferative burst after PD-1 therapy.  
623 *Nature* **537**, 417-421 (2016).
- 624 53. J. Brummelman *et al.*, High-dimensional single cell analysis identifies stem-like cytotoxic  
625 CD8(+) T cells infiltrating human tumors. *J Exp Med* **215**, 2520-2535 (2018).
- 626 54. I. Siddiqui *et al.*, Intratumoral Tcf1(+)PD-1(+)CD8(+) T Cells with Stem-like Properties  
627 Promote Tumor Control in Response to Vaccination and Checkpoint Blockade  
628 Immunotherapy. *Immunity* **50**, 195-211 e110 (2019).
- 629 55. S. Kurtulus *et al.*, Checkpoint Blockade Immunotherapy Induces Dynamic Changes in PD-  
630 1(-)CD8(+) Tumor-Infiltrating T Cells. *Immunity* **50**, 181-194 e186 (2019).
- 631 56. S. A. Nish *et al.*, CD4+ T cell effector commitment coupled to self-renewal by asymmetric  
632 cell divisions. *J Exp Med* **214**, 39-47 (2017).
- 633 57. C. M. Carlson *et al.*, Kruppel-like factor 2 regulates thymocyte and T-cell migration.  
634 *Nature* **442**, 299-302 (2006).
- 635 58. C. Trapnell *et al.*, The dynamics and regulators of cell fate decisions are revealed by  
636 pseudotemporal ordering of single cells. *Nat Biotechnol* **32**, 381-386 (2014).
- 637 59. E. J. Wherry, M. Kurachi, Molecular and cellular insights into T cell exhaustion. *Nat Rev*  
638 *Immunol* **15**, 486-499 (2015).
- 639 60. D. S. Thommen, T. N. Schumacher, T Cell Dysfunction in Cancer. *Cancer Cell* **33**, 547-  
640 562 (2018).
- 641 61. A. Liberzon *et al.*, The Molecular Signatures Database (MSigDB) hallmark gene set  
642 collection. *Cell Syst* **1**, 417-425 (2015).
- 643 62. A. Crawford *et al.*, Molecular and transcriptional basis of CD4(+) T cell dysfunction during  
644 chronic infection. *Immunity* **40**, 289-302 (2014).
- 645 63. N. Chihara *et al.*, Induction and transcriptional regulation of the co-inhibitory gene module  
646 in T cells. *Nature* **558**, 454-459 (2018).
- 647 64. T. Wu *et al.*, The TCF1-Bcl6 axis counteracts type I interferon to repress exhaustion and  
648 maintain T cell stemness. *Sci Immunol* **1**, (2016).

- 649 65. H. Ikushima, H. Negishi, T. Taniguchi, The IRF family transcription factors at the interface  
650 of innate and adaptive immune responses. *Cold Spring Harbor symposia on quantitative*  
651 *biology* **78**, 105-116 (2013).
- 652 66. L. M. Snell, T. L. McGaha, D. G. Brooks, Type I Interferon in Chronic Virus Infection and  
653 Cancer. *Trends Immunol* **38**, 542-557 (2017).
- 654 67. L. P. Cousens *et al.*, Two Roads Diverged: Interferon  $\alpha/\beta$ - and Interleukin 12-mediated  
655 Pathways in Promoting T Cell Interferon  $\gamma$  Responses during Viral Infection. *The Journal*  
656 *of Experimental Medicine* **189**, 1315-1328 (1999).
- 657 68. S. Iwata *et al.*, The Transcription Factor T-bet Limits Amplification of Type I IFN  
658 Transcriptome and Circuitry in T Helper 1 Cells. *Immunity* **46**, 983-991 e984 (2017).
- 659 69. Y. Belkaid *et al.*, A natural model of *Leishmania major* infection reveals a prolonged  
660 "silent" phase of parasite amplification in the skin before the onset of lesion formation and  
661 immunity. *J Immunol* **165**, 969-977 (2000).
- 662 70. Y. Carmi *et al.*, Allogeneic IgG combined with dendritic cell stimuli induce antitumour T-  
663 cell immunity. *Nature* **521**, 99-U254 (2015).
- 664 71. T. H. Corbett, D. P. Griswold, Jr., B. J. Roberts, J. C. Peckham, F. M. Schabel, Jr., Tumor  
665 induction relationships in development of transplantable cancers of the colon in mice for  
666 chemotherapy assays, with a note on carcinogen structure. *Cancer Res* **35**, 2434-2439  
667 (1975).
- 668 72. H. S. Grover *et al.*, The *Toxoplasma gondii* Peptide AS15 Elicits CD4 T Cells That Can  
669 Control Parasite Burden. *Infect Immun* **80**, 3279-3288 (2012).
- 670 73. L. Wang *et al.*, The zinc finger transcription factor *Zbtb7b* represses CD8-lineage gene  
671 expression in peripheral CD4<sup>+</sup> T cells. *Immunity* **29**, 876-887 (2008).
- 672 74. A. Buja, N. Eyuboglu, Remarks on Parallel Analysis. *Multivariate Behav Res* **27**, 509-540  
673 (1992).
- 674 75. L. van der Maaten, Accelerating t-SNE using Tree-Based Algorithms. *Journal of Machine*  
675 *Learning Research* **15**, 3221-3245 (2014).
- 676 76. A. L. Haber *et al.*, A single-cell survey of the small intestinal epithelium. *Nature* **551**, 333-  
677 + (2017).
- 678 77. M. S. Kowalczyk *et al.*, Single-cell RNA-seq reveals changes in cell cycle and  
679 differentiation programs upon aging of hematopoietic stem cells. *Genome Res* **25**, 1860-  
680 1872 (2015).
- 681

682

**Figures**

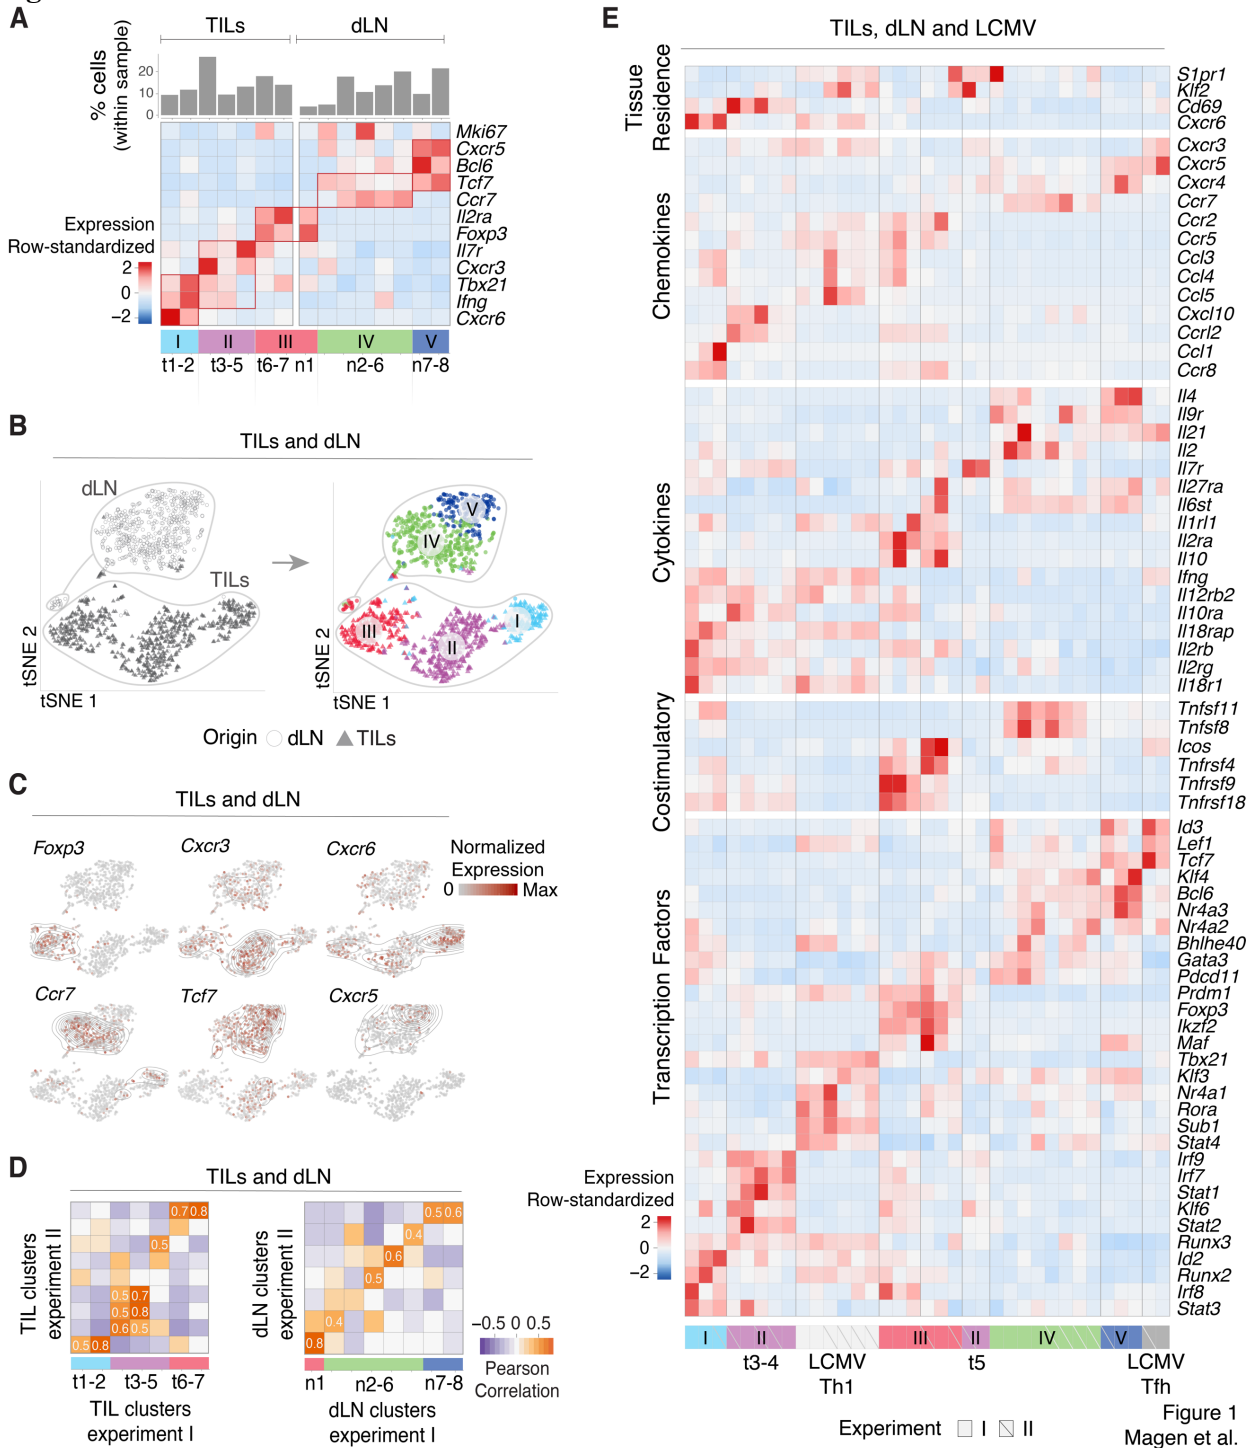

683

**Fig. 1: Characterization of CD4<sup>+</sup> TIL, dLN and LCMV transcriptomes by scRNAseq.**

(A-D) TILs and dLN cells from WT mice at day 14 post MC38-GP injection analyzed by scRNAseq. (A) Heatmap shows row-standardized expression of selected genes across TIL and dLN clusters. Bar plot indicates the number of cells in each cluster relative to the total TIL or dLN cell number. (B) tSNE display of TILs and dLN cells, grey-shaded by tissue origin (left) or

685  
686  
687  
688

689 color-coded by main group (**right**, as defined in A). **(C)** tSNE (TIL and dLN cell positioning as  
690 shown in B) display of normalized expression levels of selected genes. **(D)** Heatmap shows  
691 Pearson correlation between clusters' FC vectors (as defined in text) across the two replicate  
692 experiments for TILs (**left**) and dLN (**right**).  
693 **(E)** TILs, dLN and LCMV cells from replicate experiments I and II analyzed by  
694 scRNAseq. Heatmap shows row-standardized expression of selected genes across clusters.  
695 Group II (purple) t5 separated into a distinct component from t3-4 (as defined in text).

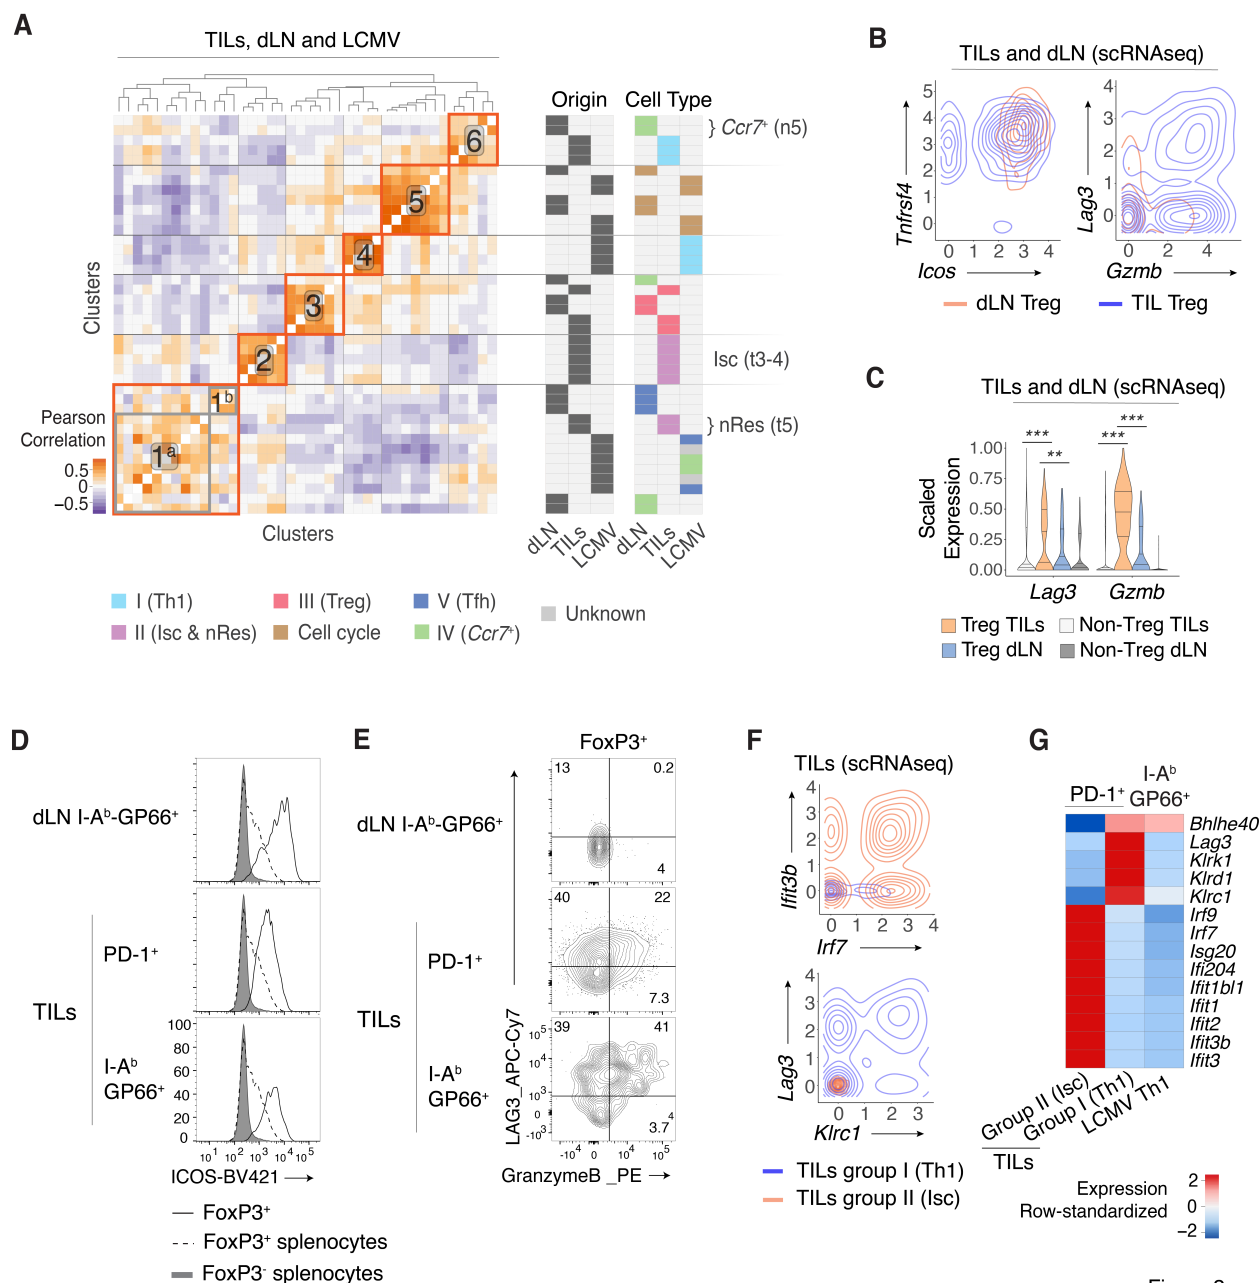

Figure 2  
Magen et al.

696

697 **Fig. 2: Treg and Th1-like transcriptomic patterns.**

698 (A) Heatmap defines meta-clusters based on Pearson correlation between TIL, dLN and  
699 LCMV cluster FC vectors (as defined in text) (left). Indicator tables show tissue origin and cell  
700 type color-code per cluster (right).

701 (B-E) Comparison of dLN Tregs and TIL Tregs (respectively clusters t6-7 and n1 as shown  
702 in Fig. 1A). (B) Contour plots of dLN Treg (orange) or TIL Treg (blue) cell distribution  
703 according to scRNAseq-detected normalized expression of *Icos* vs. *Tnfrsf4* (left) and *Gzmb* vs.  
704 *Lag3* (right). (C) Violin plot of *Lag3* and *Gzmb* scRNAseq expression in Treg vs. non-Treg TIL  
705 and dLN populations (Unpaired T test, \*\*  $p < 0.01$ , \*\*\*  $p < 0.001$ ); bands indicate quartiles  
706 (25<sup>th</sup>, 50<sup>th</sup> and 75<sup>th</sup> quantile). (D) Overlaid flow cytometry expression of ICOS in Foxp3<sup>+</sup> TILs

707 and dLN cells and Foxp3<sup>+</sup> or Foxp3<sup>-</sup> CD4<sup>+</sup> splenocytes from tumor-free control mice. **(E)** Flow  
708 cytometry contour plots of Granzyme B vs. LAG3 in Foxp3<sup>+</sup> TILs and Foxp3<sup>+</sup> dLN cells.  
709 **(F-G)** Comparison of TIL Th1 and Isc (respectively clusters t1-2 and t3-4 as shown in Fig.  
710 1A) to LCMV Th1 (as shown in Fig. 1E and S2A) **(F)** Contour plots of Th1 (orange) and Isc  
711 (blue) TIL distribution according to scRNAseq-detected normalized expression of *Irf7* vs. *Ifit3b*  
712 **(top)** and *Klrc1* vs. *Lag3* **(bottom)**. **(G)** Heatmap shows row-standardized expression of  
713 differentially expressed genes across TILs group II Isc, TILs group I Th1 and LCMV Th1.

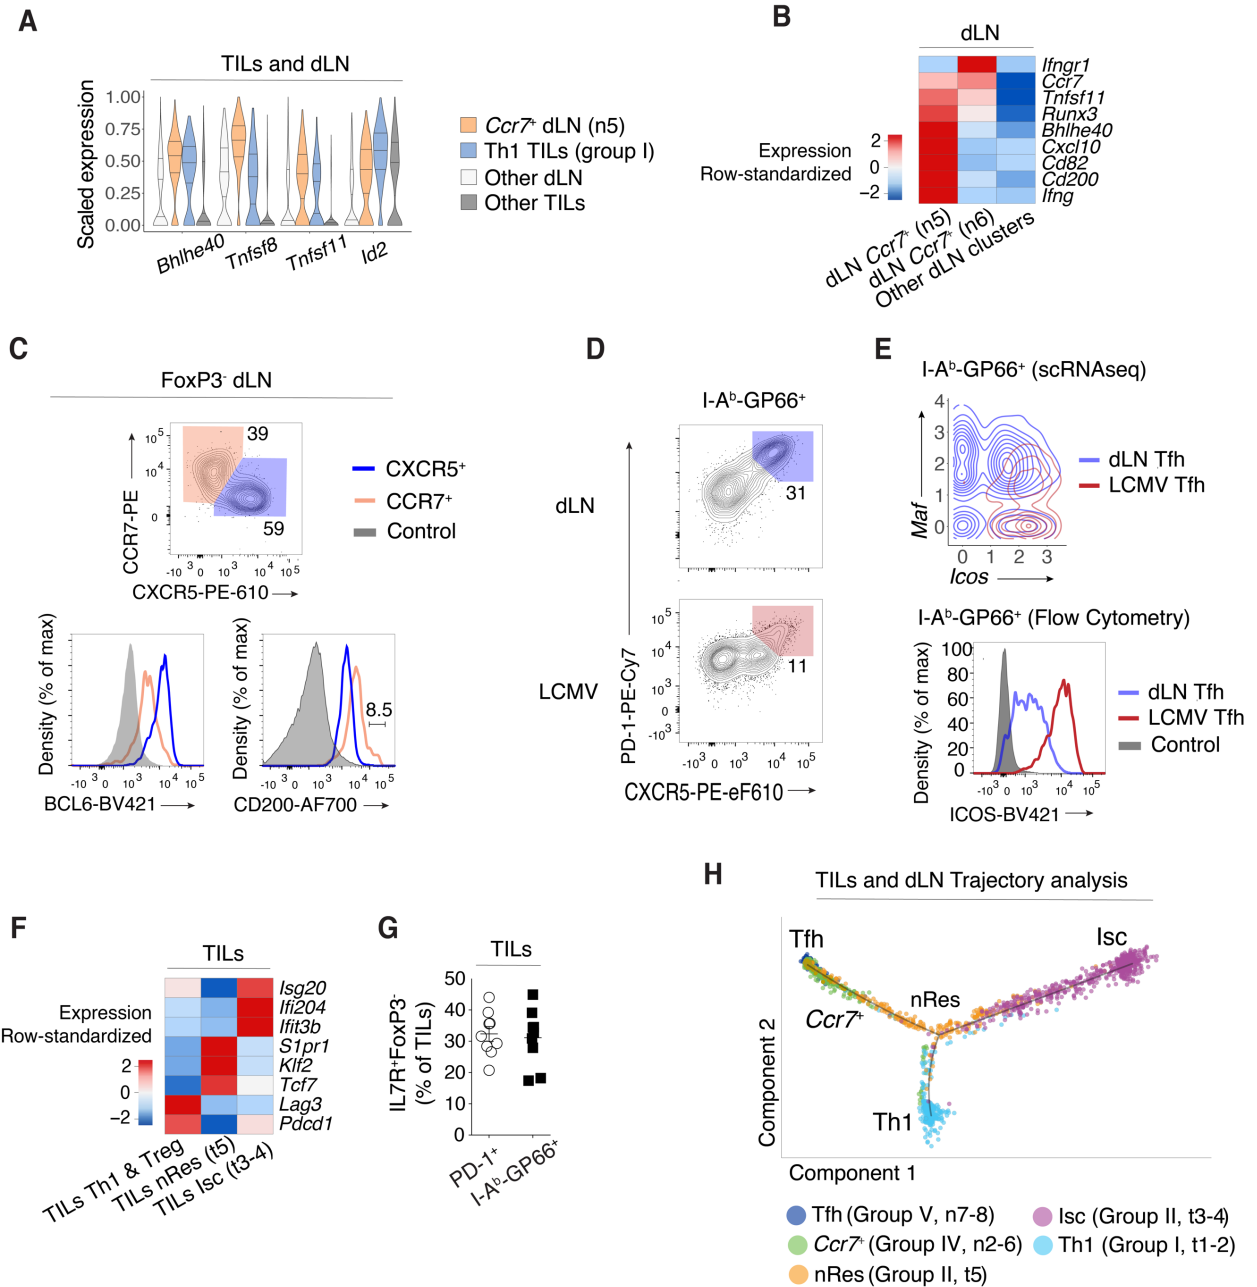

Figure 3  
Magen et al.

714

715 **Fig. 3: Transcriptomic continuum between TIL and dLN tumor-reactive cells.**

716 (A) Violin plots of differentially expressed genes across TILs group I Th1, dLN group IV  
717 *Ccr7*<sup>+</sup> (respectively clusters t1-2 and n5 as shown in Fig. 1A) and all other TIL and dLN  
718 populations.

719 (B) Heatmap shows row-standardized expression of differentially expressed genes across  
720 dLN *Ccr7*<sup>+</sup> clusters (group IV n5-6) and other dLN clusters (Treg and Tfh clusters n1 and n7-8,  
721 respectively).

722 (C) Top panel shows flow cytometry contour plots of CXCR5 vs. CCR7 in Foxp3<sup>-</sup> dLN cells.  
723 Bottom panel shows overlaid protein expression of BCL6 and CD200 in CCR7<sup>+</sup> and CXCR5<sup>+</sup>  
724 dLN cells and naive CD4<sup>+</sup> splenocytes from tumor-free control mice.  
725 (D) Flow cytometry contour plots of CXCR5 vs. PD-1 in dLN and LCMV cells.  
726 (E) Contour plot of dLN (red, clusters n7-8) and LCMV (blue) Tfh cell distribution  
727 according to scRNAseq-detected normalized expression of *Icos* vs. *Maf* (**top**). Overlaid protein  
728 expression of ICOS in dLN and LCMV PD-1<sup>+</sup>CXCR5<sup>+</sup> (Tfh) cells and naive CD4<sup>+</sup> splenocytes  
729 from tumor-free control mice (**bottom**).  
730 (F) Heatmap shows row-standardized expression of differentially expressed genes across  
731 TILs Isc and nRes clusters (as defined in text, group II t3-4 and t5, respectively) and all other  
732 TIL clusters (Th1 and Treg clusters t1-2 and t6-7, respectively).  
733 (G) Fractions of IL7R<sup>+</sup>Foxp3<sup>-</sup> cells out of total PD-1<sup>+</sup> or GP66<sup>+</sup> TILs.  
734 (H) Trajectory analysis of PD-1<sup>+</sup> TILs and GP66<sup>+</sup> dLN cells indicating individual cells  
735 assignment into a transcriptional continuum trajectory. nRes cluster (t5) is color-coded in orange  
736 in contrast to annotations in other figures.



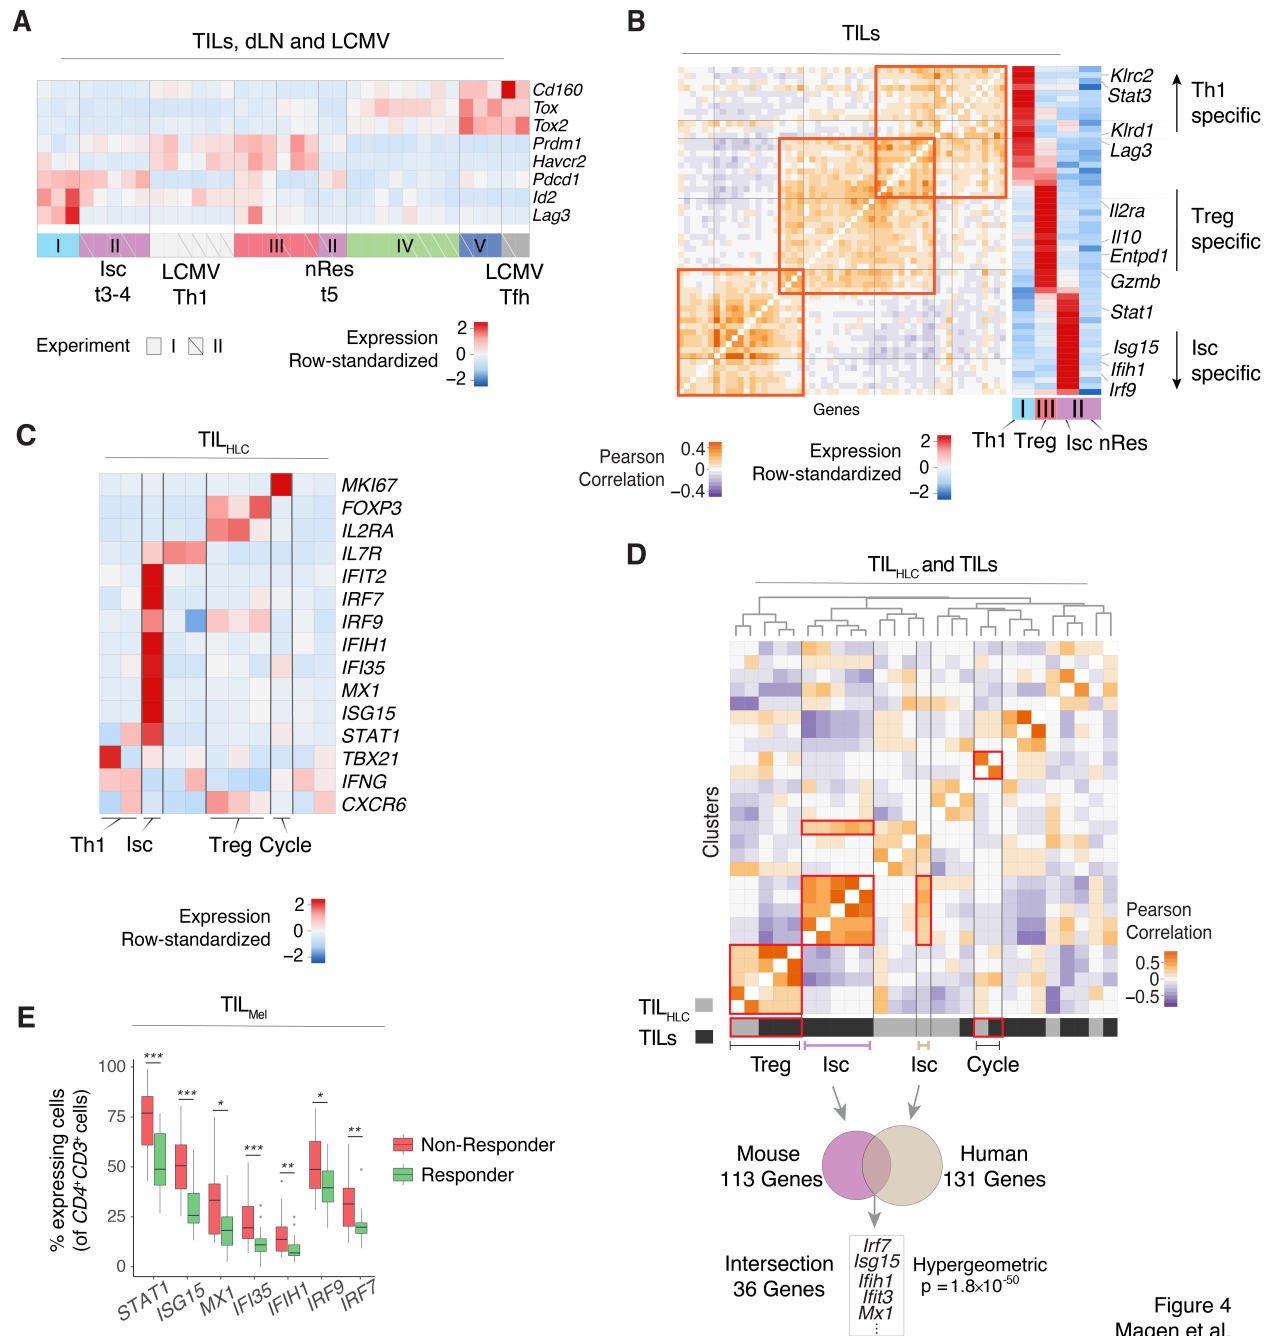

737

738 **Fig. 4: Correspondence to human data and dysfunction gene signatures.**

739 (A) Heatmap shows row-standardized expression of selected exhaustion genes across TIL,  
740 dLN and LCMV clusters from replicate experiments I and II.

741 (B) Analysis of IL-27 signature genes overlapping with TIL subpopulation characteristic  
742 genes. Heatmap shows Pearson correlation (left) and row-standardized expression of overlapping  
743 genes across TIL Th1, Treg, Isc and nRes cells (respectively clusters t1-2, t6-7, t3-4 and t5 as  
744 shown in Fig. 1A) (right).

745 (C) Analysis of human liver cancer TIL<sub>HLC</sub>. Heatmap shows row-standardized expression of  
746 selected genes across TIL<sub>HLC</sub> clusters.

747        **(D)** Heatmap defines meta-clusters based on Pearson correlation between TIL<sub>HLC</sub> and MC38-  
748 GP TIL clusters (**top**). Overlap of genes characteristic of human liver TIL Isc cluster with mouse  
749 TIL Isc gene signature (**bottom**).  
750        **(E)** Analysis of human melanoma TIL<sub>Mel</sub>. Box plots show the percentage of cells expressing  
751 selected interferon signaling characteristic genes in  $CD4^+CD3^+$  cells across responding and non-  
752 responding lesions (Unpaired Wilcoxon test, \*  $p < 0.05$ , \*\*  $p < 0.01$ , \*\*\*  $p < 0.001$ ).

753

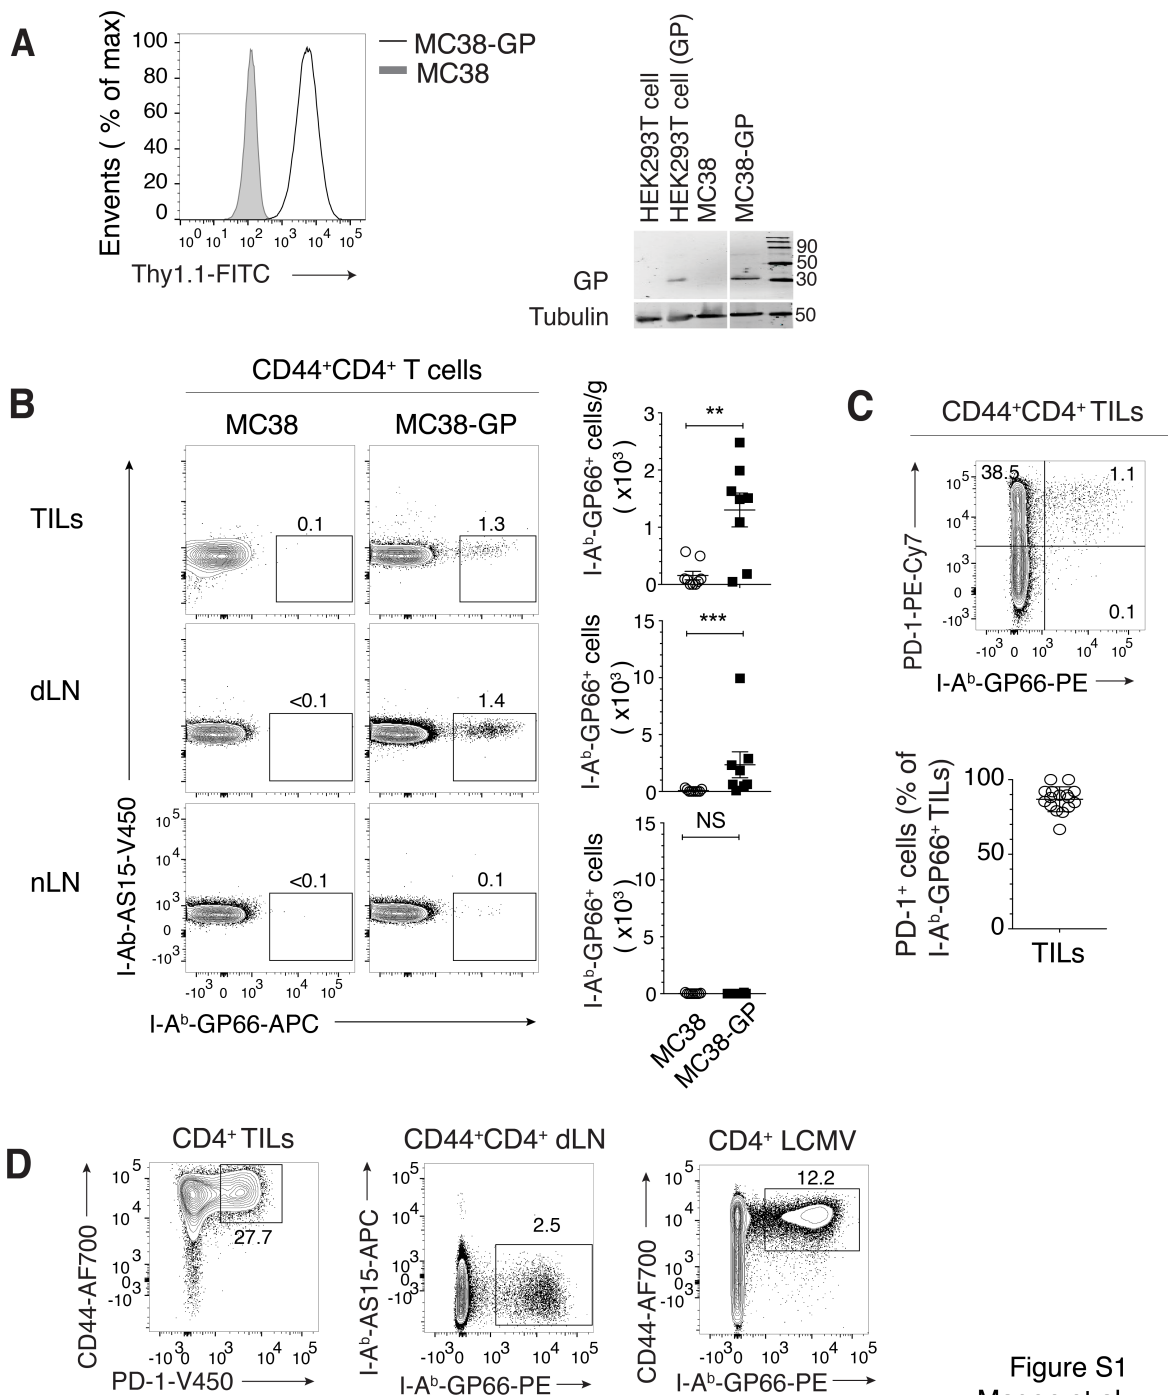

Figure S1  
Magen et al.

754

755 **Fig. S1: Characterization of antigen-specific CD4<sup>+</sup> T cell responses in MC38 colon**  
756 **adenocarcinoma tumors.**

757 (A) Left panel shows overlaid protein expression of Thy1.1 in MC38 and MC38-GP cells.  
758 Right panel shows immunoblot analysis of GP protein expression in HEK293T cells, HEK293T  
759 cells transfected with pMRX-GP-IRES-Thy1.1 plasmid, MC38 cells or MC38-GP cells.

760 **(B)** C57BL/6 mice were subcutaneously injected MC38 or MC38-GP cells and analyzed at  
761 day 14 post-injection. Left panel shows flow cytometry contour plots of GP66 vs. control (AS15  
762 peptide from *T. gondii*) class II tetramer staining in TILs, dLN and nLN from MC38 and MC38-  
763 GP tumor-bearing mice. Right panel shows the number of GP66<sup>+</sup> TILs per gram of tumor and  
764 total number of GP66<sup>+</sup> dLN and nLN cells, separately for MC38 and MC38-GP tumor-bearing  
765 mice (Unpaired Mann-Whitney U test, \*\* p < 0.01, \*\*\* p < 0.001, NS: not significant).

766 **(C)** Top panel shows flow cytometry contour plots of GP66 tetramer staining vs. PD-1 in  
767 TILs. Bottom panel shows the percentage of PD-1<sup>+</sup> cells out of GP66<sup>+</sup> TILs.

768 **(D)** GP66-specific CD44<sup>hi</sup> CD4<sup>+</sup> splenocytes were isolated from WT animals 7 days post-  
769 infection with LCMV Armstrong. Protein expression contour of populations used for scRNAseq  
770 captures from MC38-GP tumor-bearing mice (left: TILs PD-1 vs. CD44, middle: dLN GP66 vs.  
771 AS15 control) and LCMV Armstrong infected mice (right: GP66 vs. CD44).

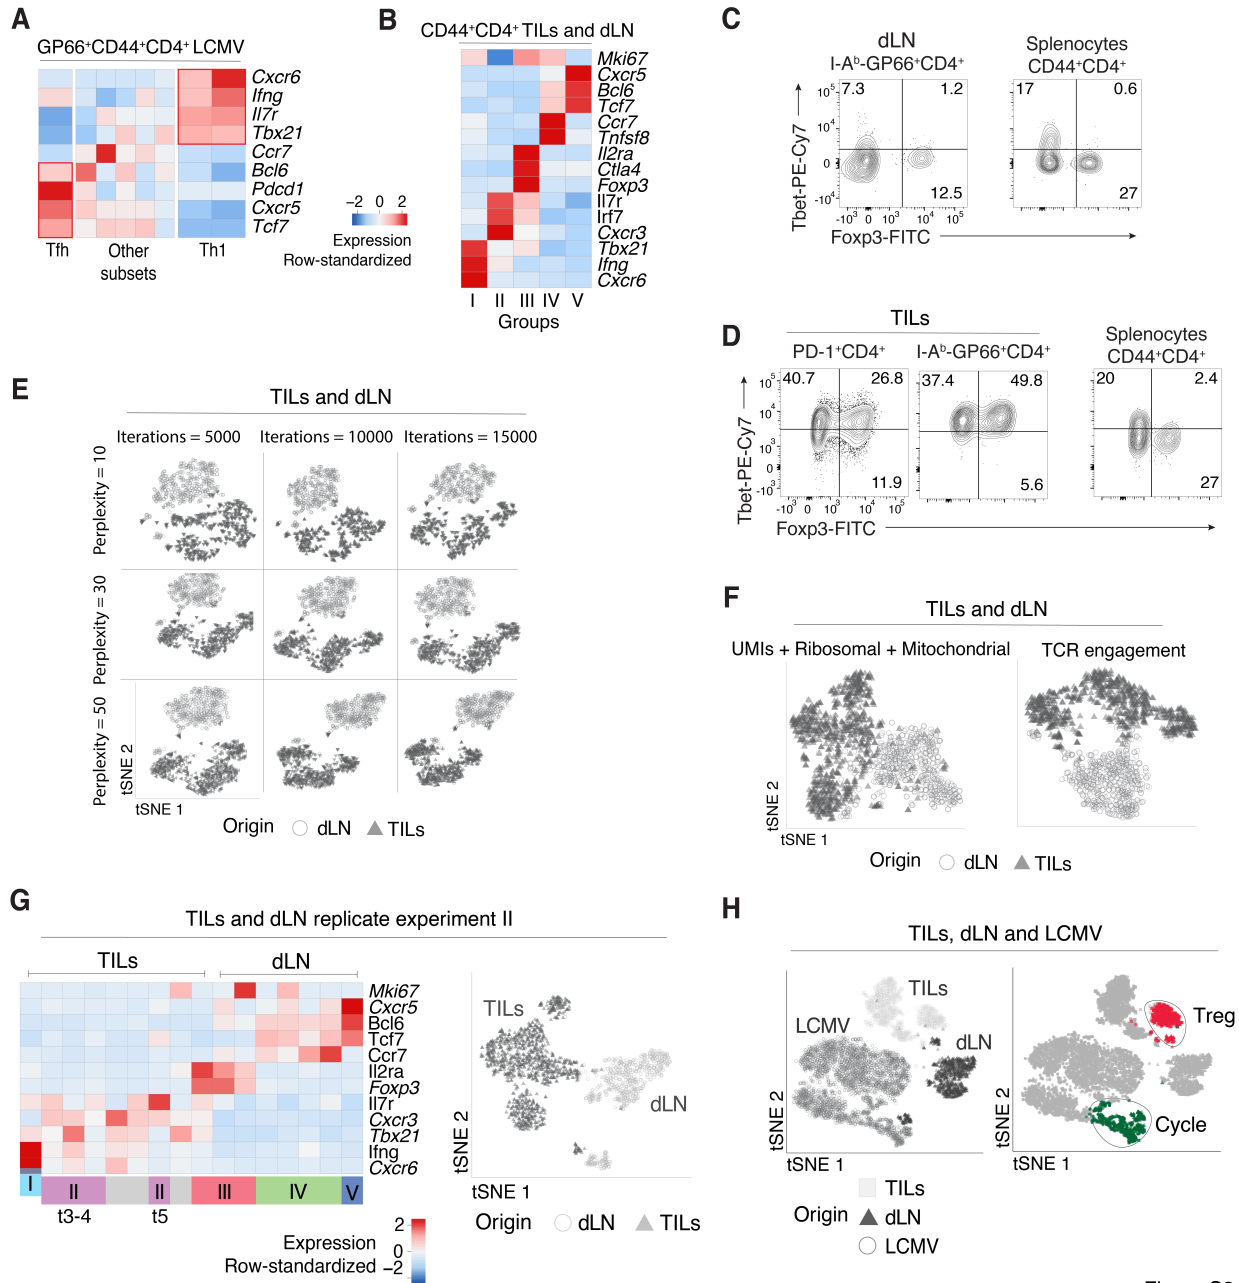

Figure S2  
Magen et al.

772

773 **Fig. S2: Characterization of immune responses to LCMV and MC38-GP by scRNAseq.**

774 (A) GP66-specific CD4<sup>+</sup> splenocytes from WT animals 7 days post-infection with LCMV  
775 Armstrong analyzed by scRNAseq. Heatmap shows row-standardized expression of selected  
776 genes across LCMV clusters.

777 (B-G) TILs and dLN cells from WT mice at day 14 post MC38-GP injection analyzed by  
778 scRNAseq. (B) Heatmap shows row-standardized expression of selected genes across main TIL  
779 and dLN groups (as defined in text). (C) Flow cytometry contour plots of Foxp3 vs. Tbet in  
780 CD44<sup>hi</sup> GP66<sup>+</sup> dLN cells (left) and in CD44<sup>hi</sup>CD4<sup>+</sup> splenocytes from tumor-free mice control  
781 (right). (D) Flow cytometry contour plots of Foxp3 vs. Tbet in PD-1<sup>+</sup> and GP66<sup>+</sup> TILs (left) and

782 in CD44<sup>hi</sup> CD4<sup>+</sup> splenocytes from tumor-free mice control (**right**). (**E**) tSNE display of TILs and  
783 dLN cells generated using different parameter combination of perplexity and number of  
784 iterations, grey-shaded by tissue origin. (**F**) tSNE displays of TILs and dLN cells, grey-shaded  
785 by tissue origin, post confounder correction for number of unique molecular identifiers (UMIs)  
786 and expression of ribosomal and mitochondrial coding genes (**left**) or TCR engagement on dLN  
787 cells as a result of GP66-tetramer-based purification (**right**). (**G**) scRNAseq analysis of TILs and  
788 dLN cells from replicate experiment II. Heatmap shows row-standardized expression of selected  
789 genes across TIL and dLN clusters (**left**). tSNE display of TILs and dLN cells, grey-shaded by  
790 tissue origin (**right**).  
791 (**H**) TILs, dLN and LCMV cells from replicate experiments I and II analyzed by scRNAseq.  
792 tSNE plots show TILs, dLN, and LCMV cells, grey-shaded by origin (**left**) or color-coded by  
793 Treg or cell-cycle (Cycle) clustering assignment (grey for all other clusters) (**right**).

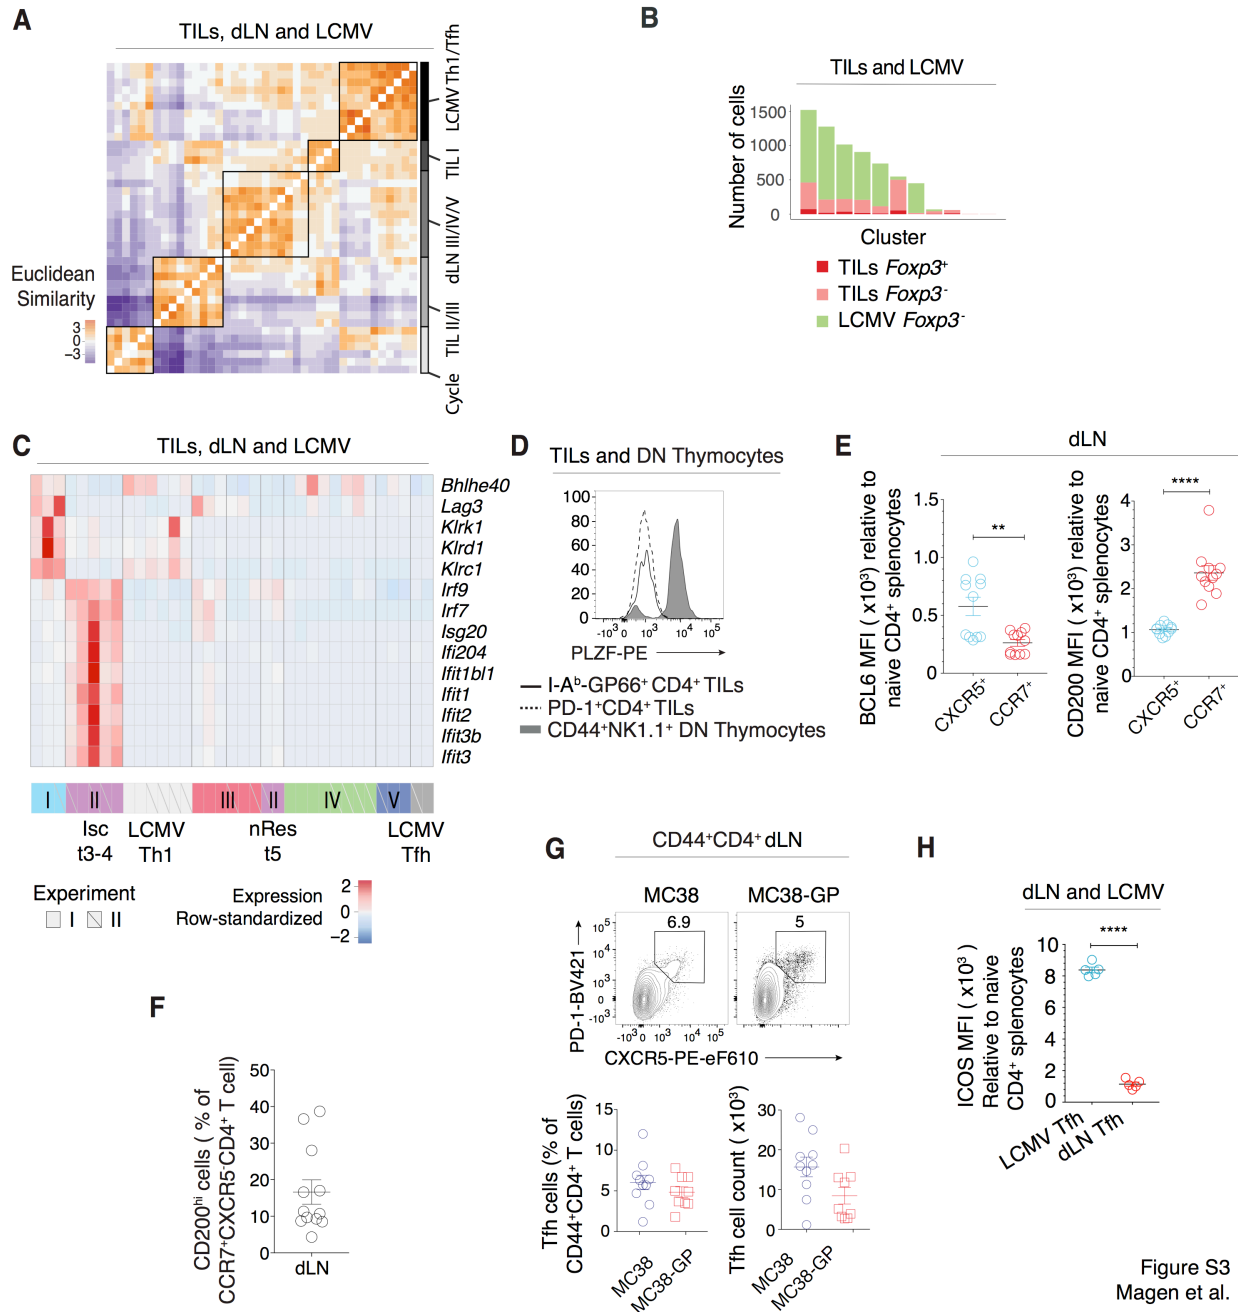

Figure S3  
Magen et al.

794

795 **Fig. S3: Assessment of tissue-context-specific effects on clustering analyses and TILs-dLN**  
796 **heterogeneity.**

797 (A-C) TILs, dLN and LCMV cells from replicate experiments I and II analyzed by  
798 scRNAseq. (A) Heatmap shows Euclidean similarity between cluster-specific average expression  
799 vectors (as defined in text) (left) annotated with cluster origin and cluster group or type (right).  
800 (B) Bar plot shows relative cluster composition of *Foxp3*<sup>+</sup> or *Foxp3*<sup>-</sup> TILs and *Foxp3*<sup>+</sup> LCMV (no  
801 *Foxp3*<sup>+</sup> cells found in GP66<sup>+</sup> LCMV) after applying a data integration approach (44). (C)  
802 Heatmap shows row-standardized expression of TIL Isc and Th1 characteristic genes across TIL,  
803 dLN and LCMV clusters.

804        **(D)** Overlaid protein expression of PLZF in GP66<sup>+</sup> and PD-1<sup>+</sup> TILs and CD44<sup>hi</sup> NK1.1<sup>+</sup> DN  
805 (double negative CD4<sup>-</sup>CD8<sup>-</sup>) thymocytes from tumor-free control mice.  
806        **(E)** Mean fluorescence intensity (MFI) of BCL6 and CD200 in CXCR5<sup>+</sup> or CCR7<sup>+</sup>GP66<sup>+</sup>  
807 dLN cells relative to naive CD4<sup>+</sup> splenocytes from tumor-free control mice (Unpaired t-test, \*\* p  
808 < 0.005, \*\*\*\* p < 0.0001).  
809        **(F)** Percentage of CD200<sup>hi</sup> cells out of CCR7<sup>+</sup>CXCR5<sup>+</sup> dLN cells.  
810        **(G)** Top panel shows flow cytometry contour plots of CXCR5 vs. PD-1 in CD44<sup>hi</sup> CD4<sup>+</sup> dLN  
811 cells from MC38 and MC38-GP tumor-bearing mice. Bottom panel shows percentage of Tfh  
812 cells out of total CD44<sup>hi</sup> CD4<sup>+</sup> T cells in dLN (**left**) and total number of Tfh cells (**right**).  
813        **(H)** Mean fluorescence intensity (MFI) levels of ICOS in LCMV Tfh and dLN Tfh relative to  
814 naive CD4<sup>+</sup> splenocytes from tumor-free control mice (Unpaired t-test, p < 10<sup>-5</sup>).



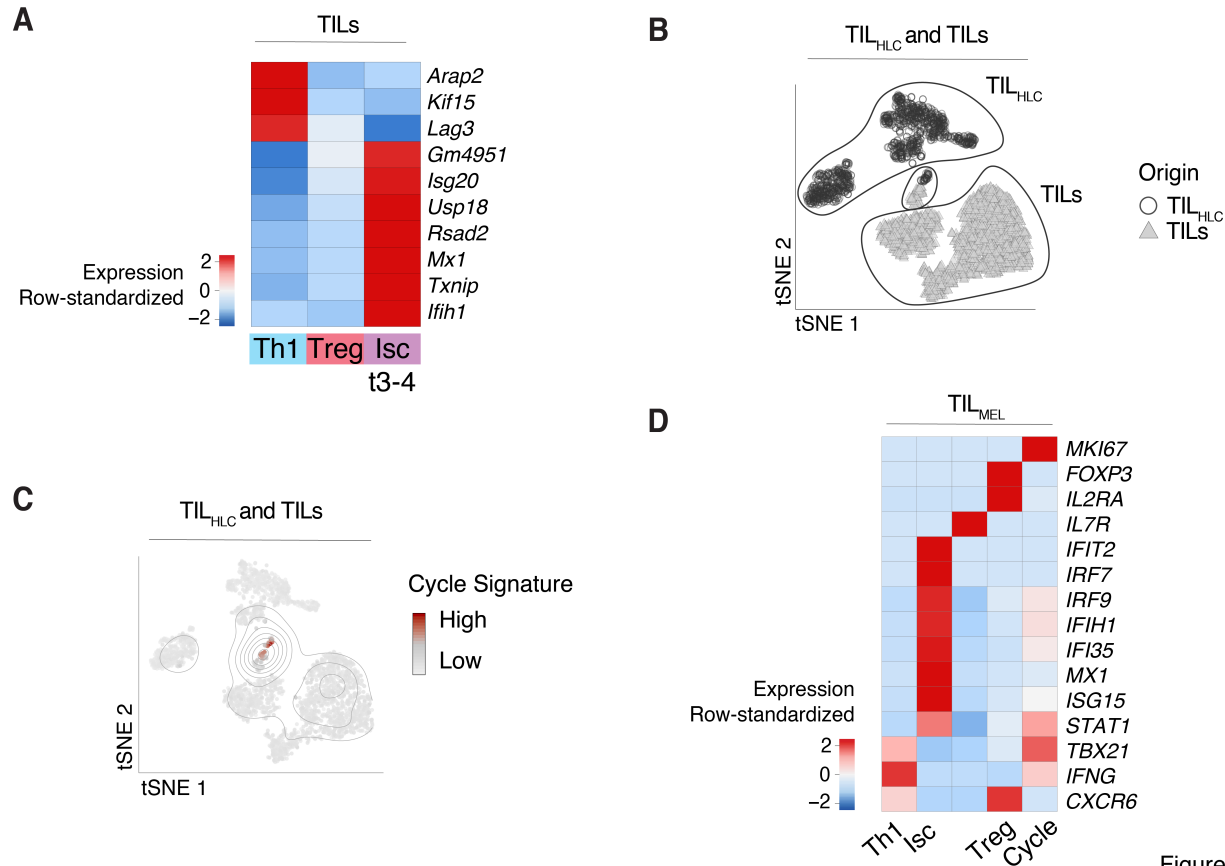

Figure S4  
Magen et al.

815

816 **Fig. S4: Correspondence to human data and dysfunction gene signatures.**

817 (A) Heatmap shows row-standardized expression of selected exhaustion genes across TIL

818 Th1, Treg and Isc clusters (respectively clusters t1-2, t6-7 and t3-4 as shown in Fig. 1A).

819 (B-C) Analysis of TIL<sub>HLC</sub> and TILs (as defined in text). (B) tSNE plots show cells grey-

820 shaded by origin. (C) tSNE plots show cells color-coded by cell cycle signature activation level.

821 (D) Analysis of TIL<sub>Mel</sub> (as defined in text). Heatmap shows row-standardized expression of

822 selected TIL characteristic genes across TIL<sub>Mel</sub> clusters.

823 **Supplementary Note**

824 GP66-tetramer binding results in potential cross-linking of and signaling by the TCR of GP66-  
825 specific T cells. To model the transcriptomic effect of TCR engagement as a result of GP66-  
826 tetramer-based purification, we sought to compare LCMV-specific CD4<sup>+</sup> T cells obtained either  
827 after GP66-tetramer purification or without tetramer-based purification. To enrich in such cells  
828 without tetramer staining, we noted that ~94% of GP66-specific CD4<sup>+</sup> splenocytes from LCMV-  
829 infected mice express little or no IL7R [IL-7 receptor  $\alpha$  chain] (**Suppl. Note Figure A**). Thus,  
830 we considered that most CD44<sup>hi</sup>CD4<sup>+</sup>IL7R<sup>+</sup> splenocytes were not LCMV-specific, and sorted  
831 CD44<sup>hi</sup>IL7R<sup>-</sup> (LCMV IL7R<sup>-</sup>) T cells for scRNAseq; in addition to antigen-specific CD44<sup>hi</sup>  
832 GP66-tetramer purified (LCMV GP66<sup>+</sup>) T cells (**Suppl. Note Figure B**). Pooled clustering of the  
833 two samples revealed 2 (out of 6) clusters heavily dominated by stained cells (**Suppl. Note**  
834 **Figure C, top**), suggesting staining bias limited to those clusters. As expected from GP66  
835 tetramer engagement with the TCR, GP66-specific clusters were characterized by genes involved  
836 in T cell receptor signaling and NF $\kappa$ B signaling (**Table S9**), while clusters containing cells from  
837 both samples displayed features of Tfh and Th1 cells (**Suppl. Note Figure C, bottom**). We  
838 designated the GP66-characteristic genes as the TCR engagement GP66 signature (**Table S10**)  
839 and regressed the activation scores of the signature from the expression matrix using a linear  
840 regression model fitted to each gene.

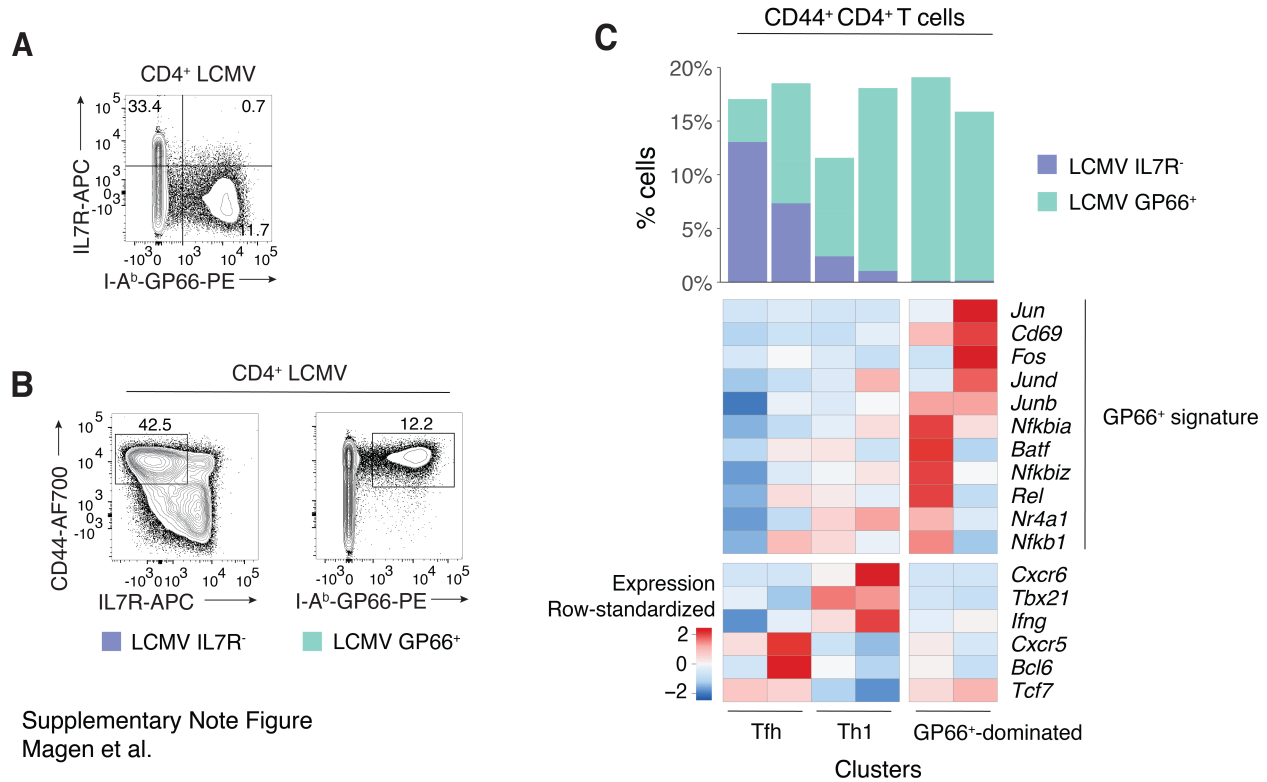

Supplementary Note Figure  
Magen et al.

841

842 **Supplementary Note Figure: Transcriptomic effects of TCR engagement as a result of**  
843 **GP66-tetramer-based purification.**

844 (A-B) Analysis of CD4<sup>+</sup> splenocytes from C57BL/6 animals 7 days post-infection with  
845 LCMV Armstrong. (A) Flow cytometry contour plot of GP66 tetramer staining vs. IL7R in CD4<sup>+</sup>  
846 LCMV cells. (B) Flow cytometry contour plots of IL7R vs. CD44 (for LCMV IL7R<sup>-</sup> sample,  
847 left) and GP66 vs. CD44 (for LCMV GP66<sup>+</sup> sample, right).  
848 (C) LCMV IL7R<sup>-</sup> and LCMV GP66<sup>+</sup> cells analyzed by scRNAseq. Heatmap shows row-  
849 stand-standardized expression of selected genes across pooled LCMV IL7R<sup>-</sup> and LCMV GP66<sup>+</sup> clusters  
850 (bottom). Bar plot indicates the number of LCMV IL7R<sup>-</sup> and LCMV GP66<sup>+</sup> cells in each cluster  
851 relative to the total number of cells (top).
